# Expression Profiling of Reciprocal Maize Hybrids Divergent for Cold Germination and Desiccation Tolerance

Krishna P. Kollipara\*, Imad N. Saab, Robert D. Wych, Michael J. Lauer, and George W. Singletary

Pioneer Hi-Bred International, Johnston, Iowa 50131-1004

Recombinant inbred lines (RILs) derived from B73 × M017 were screened for cold germination (CG) and desiccation tolerance (DT) phenotypes. Reciprocal F<sub>1</sub> hybrids were made between divergent RILs, and hybrids that showed differential phenotypes (parent-of-origin effect) for CG or DT were selected for profiling mRNA and protein expression. mRNA and proteins were extracted from embryo axes of seed germinated for 11 d at 12.5°C in the dark and developing embryos at 40% seed moisture (R5 stage) for CG and DT, respectively. GeneCalling analysis, an open-ended mRNA profiling method, identified 336 of 32,496 and 656 of 32,940 cDNA fragments that showed ≥1.5-fold change in expression between the reciprocal F<sub>1</sub> hybrids for CG and DT, respectively. Protein expression map (PEM) analysis, an open-ended two-dimensional polyacrylamide gel electrophoresis, identified 117 of 2,641 and 205 of 1,876 detected proteins to be differentially expressed with ≥1.5-fold change between the reciprocal F<sub>1</sub> hybrids in CG and DT samples, respectively. A subset of these proteins was identified by tandem mass spectrometry followed by database query of the spectra. The differentially expressed genes/proteins were classified into various functional groups including carbohydrate and amino acid metabolism, ion transporters, stress and defense response, polyamine metabolism, chaperonins, cytoskeleton associated, etc. Phenotypic analysis of seed from self-pollinated ears of the reciprocal F<sub>1</sub> hybrids displayed small differences compared with the reciprocal hybrids themselves, suggesting a negligible effect of cytoplasmic factors on CG and DT traits. The results provide leads to improving our understanding of the genes involved in stress response during seed maturation and germination.

There have been several reports where differential phenotypic expression was observed between reciprocal F<sub>1</sub> hybrids in maize (*Zea mays*) for various kernel and germination traits such as whole-kernel growth rate (Groszmann and Sprague, 1948), embryo and endosperm dry weight (Bagnara and Daynard, 1983), embryo oil and protein (Miller and Brimhall, 1951), zein synthesis (Chaudhuri and Messing, 1994), seed germination at low temperatures (Pinnell, 1949), and tolerance to drying injury (Bdliya and Burris, 1988). These differential expressions can be attributed to epigenetic phenomena such as genomic imprinting (described below) and xenia (refers to the effect of pollen on the endosperm phenotype in the same generation), dosage effects (in case of triploid tissue such as endosperm), and cytoplasmic effects (so-called maternal effects from mitochondrial and chloroplast genomes or nuclear-encoded cytoplasmically stored gene products).

Genomic imprinting, also referred to as uniparental dominance or parent-of-origin effect, is a well-studied phenomenon in both mammals and plants (for reviews, see Alleman and Doctor, 2000; Reik and Walter, 2001). Imprinting refers to a reversible epigenetic modification of loci resulting in differential expression of genes depending on the parent of origin.

Unlike Mendelian inheritance, a given allele of an imprinted gene is phenotypically expressed in the F<sub>1</sub> depending on whether it is transmitted through the male or female parent. Imprinting in mammals occurs primarily via differential DNA methylation and alteration in chromatin structure resulting in silencing of specific allele (see Feil and Khosla, 1999; Tilghman, 1999). Possible roles of differential methylation in imprinting of zein and  $\alpha$ -tubulin genes in maize (Lund et al., 1995a, 1995b) and chromatin remodeling (structural alteration in chromatin) in regulating imprinting of MEDEA (*MEA*) locus in Arabidopsis (Jeddeloh et al., 1999; Vielle-Calzada et al., 1999) have been reported. However, the specific role of DNA methylation-mediated gene silencing in imprinting of genes during embryo and endosperm development in plants is not clear (Vielle-Calzada et al., 1999; Luo et al., 2000; Russinova and de Vries, 2000).

Comparison of reciprocal F<sub>1</sub> hybrids provides an excellent system to study genes associated with parent-of-origin effects (some of which may be due to genomic imprinting) in diploid tissue that influences various traits of agronomic interest. In hybrid seed production systems such as maize, sorghum, and millets, identification of genes associated with imprinting provides an opportunity to select parents (male or female) through which to introduce the desired alleles.

Northern corn-growing regions have a short crop-growing season. This often requires planting of seed

\* Corresponding author; e-mail Krishna.Kollipara@pioneer.com; fax 515-334-4778.

Article, publication date, and citation information can be found at [www.plantphysiol.org/cgi/doi/10.1104/pp.000729](http://www.plantphysiol.org/cgi/doi/10.1104/pp.000729).

early in the season, when soil temperatures are low, followed by early season harvesting to avoid frost injury. Therefore, it is important for grain to be used as seed to tolerate artificial drying (desiccation) when harvested at high seed moisture ( $\geq 40\%$ ) and to retain the ability to germinate under cold conditions for better field stand establishment. Extensive efforts have been devoted to understanding the genetics and physiology of the cold germination (CG) and desiccation tolerance (DT) traits (Burris, 2000; Hoegemeyer and Gutormsen, 2000). Changes in various compositional (oligosaccharides, lipids, hormones, enzymes, free radicals, and metabolic intermediates) and organellar/suborganellar properties (mitochondria, oil and protein bodies, starch grains, membrane integrity, and structure of chromatin and proteins) in the seed and germinating seedlings of maize have been reported to be associated with CG (Yacoub and Fillion, 1986; Janowiak and Markowski, 1987; Stewart et al., 1990a, 1990b; Schell et al., 1991; Prasad, 1996, 1997; Santis et al., 1999) and DT (Leprince et al., 1993, 1994, 1995; Bochicchio et al., 1994a, 1994b; Oishi and Bewley, 1990; Chen and Burris, 1991; Brenac et al., 1997; Obendorf, 1997; Perdomo and Burris, 1998; Wolkers et al., 1998).

Much of the literature relevant to cold stress response at the molecular level comes from *Arabidopsis* where several cold-regulated (COR) genes induced in response to abscisic acid (ABA) were characterized (for review, see Thomashow, 1999). An ABA-independent low-temperature responsive regulatory cascade involving a sequential expression of C-repeat (CRT)/dehydration responsive element (DRE) binding factors genes, followed by CRT/DRE-containing COR genes was recently characterized in *Arabidopsis* (Stockinger et al., 1997; Gilmour et al., 1998; Liu et al., 1998; Shinozaki and Yamaguchi-Shinozaki, 2000). Overexpression of CRT/DRE binding factor-1 or DREB1A under the control of cauliflower mosaic virus 35S or stress inducible rd29A promoters was found to induce COR genes enhancing freezing tolerance in *Arabidopsis* (Jaglo-Ottosen et al., 1998; Kasuga et al., 1999). Seki et al. (2001) reported a genome-wide survey of mRNA expression pattern of approximately 1,300 genes, using cDNA microarray, in *Arabidopsis* subjected to drought and cold stress at various stages from germination to maturity. They identified 44 and 19 cDNAs that were inducible by drought and cold stress, respectively, of which 12 were DREB1A target genes. Such detailed molecular studies of cold and desiccation stress responses have not been reported in maize.

The objective of this study was to identify differentially expressed genes related to CG and DT phenotypes. We have identified phenotypically divergent recombinant inbred lines (RILs) from the cross B73  $\times$  M017 (SX-19) for CG and DT and produced reciprocal  $F_1$  hybrids. The reciprocal  $F_1$  hybrids that showed differential phenotypes for CG and DT, an

indication of potential imprinting effects (or nuclear cytoplasmic effects), were profiled for mRNA and protein expression using open-ended platforms. This approach allowed the profiling of genetically identical material thus enhancing the effectiveness of expression profiling.

## RESULTS

### Screening, Crossing, and Phenotypic Analysis

Five RILs that showed high germination ( $>90\%$ ) and five RILs that showed low germination ( $\leq 30\%$ ) under cold test conditions were identified. Similarly, five each of tolerant and sensitive RILs to high-temperature desiccation were identified. All genotypes germinated normally at ambient temperatures (data not shown). Reciprocal  $F_1$  hybrids produced in a five-by-five diallel-crossing scheme, showed varying degrees of responses within each trait (data not shown). The  $F_1$  hybrids displayed transgressive (heterosis) and additive responses compared with their self-pollinated parental phenotypes. In instances where the reciprocal  $F_1$  hybrids showed differential phenotypes, the phenotype of the  $F_1$ s with the high parent (i.e. parent with high germination score) as the maternal parent was typically higher in their germination scores compared with those with low parents as the maternal parent. Maternal dominance was clearly evident among some, but not all, RIL combinations for both traits. Of all of the possible RIL combinations tested within each trait, at least six and five showed parent-of-origin effect for CG and GT, respectively (data not shown). Because of the complexity and resource requirements of the profiling methods used, only one representative RIL combination from each trait was selected for expression profiling (Figs. 1–3). We commonly observed among the data, as demonstrated for CG in Figure 1, that the phenotype of the  $F_1$  hybrid (i.e. M0023-syn0  $\times$  M0081-syn0), which involved the low-phenotype parent (i.e. M0023-syn0) as a female, was typically close to the mid-parent value. This pattern of maternal influence attributable to parent-of-origin effect was previously observed in other studies involving

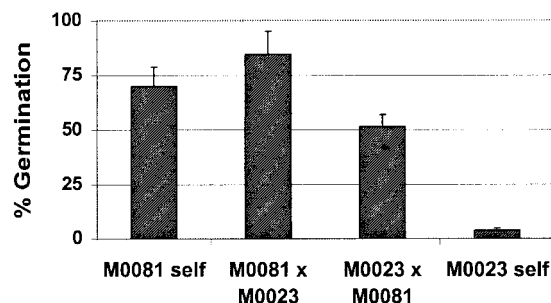

**Figure 1.** CG response of self-pollinated RILs and their reciprocal  $F_1$  hybrids. The differential response of the reciprocal  $F_1$  hybrids indicates maternal dominance (parent-of-origin effect).

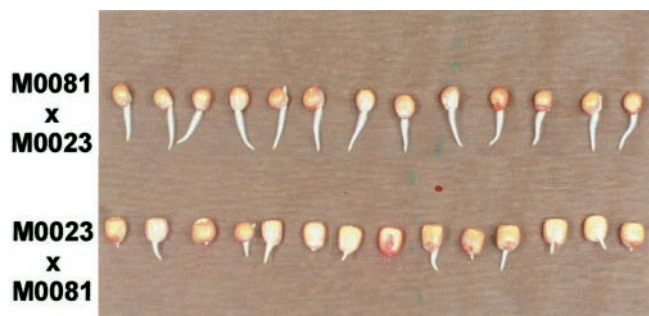

**Figure 2.** Seeds of reciprocal F<sub>1</sub> hybrids germinated for 11 d at 12.5°C in the dark. Top panel, F<sub>1</sub> (M0081-syn0 × M0023-syn0); bottom panel, F<sub>1</sub> (M0023-syn0 × M0081-syn0). Parents, M0081-syn0, and M0023-syn0 showed a similar response to that of F<sub>1</sub>-M0081-syn0 × M0023-syn0 and the F<sub>1</sub>-M0023-syn0 × M0081-syn0, respectively (data not shown).

maize kernel growth and its components (Groszmann and Sprague, 1948; Bagnara and Daynard, 1983). Phenotypic differences between the reciprocal F<sub>1</sub> hybrids could also be clearly seen when the seeds were germinated at 12.5°C for 11 d in the dark (Fig. 2).

When the seeds were harvested at high moisture (40%) and dried at high temperature (43°C), the phenotypic differences between the reciprocal F<sub>1</sub>s in the DT experiment was similar to those in the CG experiment, with one exception. The phenotype of the F<sub>1</sub> M0337-syn4 × M0021-syn4 having the low-DT parent (M0337-syn4) as female did not approach the mid-parent value (Fig. 3). Although the reciprocal F<sub>1</sub> hybrids were significantly different in their phenotype after drying at high (43°C) temperature, the phenotypic differences were not significant after drying at the low (35°C) temperature (Fig. 3). When the reciprocal F<sub>1</sub> hybrids of CG and DT traits were self-pollinated in the subsequent year, the magnitude of phenotypic differences between them was

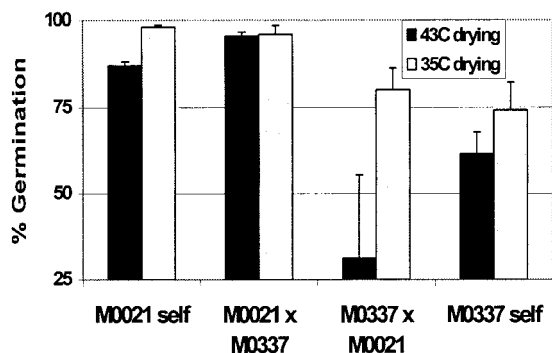

**Figure 3.** CG response of self-pollinated RILs and their reciprocal F<sub>1</sub>s after high-moisture harvest and high- or low-temperature drying. The differential response of the reciprocal F<sub>1</sub> hybrids at high-temperature (43°C) drying but not at low-temperature (35°C) drying indicates maternal dominance (parent-of-origin effect).

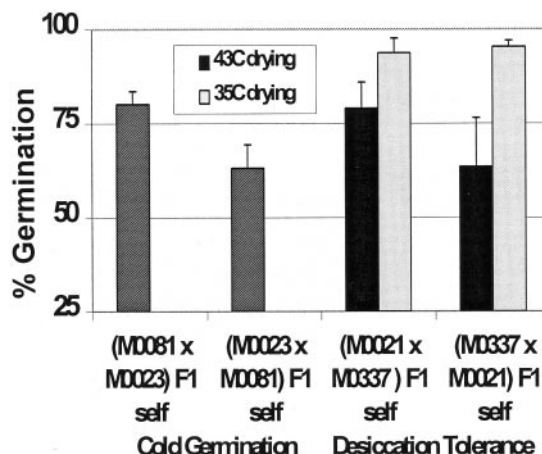

**Figure 4.** CG response of self-pollinated reciprocal F<sub>1</sub> hybrids. The phenotypic differences between the self-pollinated reciprocal F<sub>1</sub> hybrids were significantly reduced for both CG and DT traits. This suggests that the phenotypic differences between the reciprocal F<sub>1</sub> hybrids were mainly due to nuclear genes rather than cytoplasmic (mitochondrial or chloroplast genomes) factors.

noticeably reduced (Fig. 4). This suggests that the nuclear genome played a major role in determining phenotypic differences observed in the F<sub>1</sub> generation, rather than cytoplasmic (mitochondrial and chloroplast) genes.

**Transcript Profiling**

cDNAs synthesized from poly(A<sup>+</sup>) RNA of germinating embryo axes (CG) and embryos at 40% moisture content (DT) were digested with unique pairs of restriction enzymes in separate reactions. cDNA restriction fragments resolved by capillary gel electrophoresis varied in length from 40 to 450 nt. Use of 89 and 88 restriction enzyme pairs yielded a total of 32,496 and 32,940 detectable cDNA fragments in CG and DT samples, respectively. Quantitative expression analysis of the individual fragments, as shown by the peak heights in the electrophoretic scans, revealed that only 336 (1%) and 656 (2%) of the cDNA fragments were differentially expressed with ≥1.5-fold change between the reciprocal F<sub>1</sub> hybrids in CG and DT traits, respectively.

GeneCalling analysis identified the genes that matched the cDNA restriction fragments against the predicted fragments in the public and proprietary databases. Most of the fragments matched more than one gene in the databases. Also, many genes were “called” by more than one cDNA restriction fragment. A subset of the cDNA fragments and their corresponding gene matches were selected for confirmation through cloning, sequencing, and competitive PCR analyses. The selection was based on whether the fragment showed a high degree of fold change between the reciprocal F<sub>1</sub> hybrids and/or whether multiple cDNA fragments, with a consistent pattern of differential expression (measured by *t*

test), were indicated for a given gene. In cases where the same gene matched multiple cDNA fragments with similar levels of expression, only one of the fragments was included for analysis. The confirmed genes with their function, fold change in expression, and cDNA restriction fragment size are listed in Ta-

ble I for CG and in Table II for DT. The gene names and accession numbers were obtained using BLAST search of the public databases (GenBank and SwissProt/TrEMBL) with probability value of  $\leq 1 \times 10^{-07}$ . Competitive PCR analysis using sequence-specific primers was used for sequence confirmation

**Table 1.** Differentially expressed genes for the CG trait revealed by mRNA profiling

The expression levels of mRNA extracted from embryo axes tissue of seeds germinated for 11 d at 12.5°C in the dark were compared between the reciprocal F<sub>1</sub> hybrids that were high (M0081-syn0 × M0023-syn0) and low (M0023-syn0 × M0081-syn0) for CG phenotype. The gene/maize EST identities of the cDNA fragments were obtained by BLAST search of the GenBank and SwisProt/TrEMBL databases with a probability value of  $\leq 1.0 \times 10^{-7}$ .

| Change <sup>a</sup> | Accession No. <sup>b</sup> | Percent Identity <sup>c</sup> | cDNA Size <sup>d</sup> | Function <sup>e</sup>                                | Gene Description or Source of EST <sup>f</sup>                                       |
|---------------------|----------------------------|-------------------------------|------------------------|------------------------------------------------------|--------------------------------------------------------------------------------------|
| <i>-fold</i>        |                            |                               | <i>nt</i>              |                                                      |                                                                                      |
| 1.5                 | Q42972;<br>A1637077        | 78; 98                        | 286                    | Carbohydrate metabolism                              | Malate dehydrogenase, glyoxysomal (EC 1.1.1.37); Stressed shoot cDNA library         |
| 5                   | U27116                     | 94                            | 278                    | Cell wall structure                                  | Caffeoyl-CoA 3-O-methyltransferase                                                   |
| 1.7                 | O24496;<br>AA979807        | 79; 98                        | 138                    | Cellular detoxification                              | Glyoxalase II (cytoplasmic isozyme, EC 3.1.2.6); green seedling cDNA library         |
| -3.3                | AF077407                   | 100                           | 113                    | Chaperonin                                           | Chaperonin containing TCP-1 complex $\gamma$ -chain                                  |
| 2.1                 | Q9SL04;<br>AW146747        | 85; 97                        | 446                    | Cytoskeletal structural protein                      | Microtubule-associated protein; root cDNA library                                    |
| -1.8                | X15704                     | 100                           | 427                    | Cytoskeletal structural protein                      | Tubulin ( $\alpha$ 1 and 2)                                                          |
| 2.8                 | X57313                     | 100                           | 75                     | DNA synthesis and replication                        | H2B histone                                                                          |
| 1.6                 | Q9LT02                     | 80                            | 354                    | Ion channel                                          | Cation-transporting ATPase (EC 3.6.3.-)                                              |
| 2.7                 | AF089838                   | 100                           | 80                     | Lipid and sterol metabolism                          | Phosphatidylglycerol/phosphatidylinositol transfer protein                           |
| 14.5                | AF085149                   | 100                           | 74                     | Protein destination and storage                      | Aminotransferase                                                                     |
| 1.9                 | AF033496                   | 100                           | 314                    | Secondary metabolism (phenolic O-methyl transferase) | Herbicide safener binding protein (SBP1)                                             |
| 5                   | Y07767                     | 100                           | 59                     | Secondary metabolism (polyamine)                     | S-Adenosylmethionine decarboxylase                                                   |
| 2.3                 | AF039573                   | 100                           | 165                    | Stress response                                      | ABA- and stress-inducible protein (Asr1)                                             |
| 1.9                 | Q9XFH5                     | 73                            | 122                    | Sulfur metabolism                                    | Alliinase (EC 4.4.1.4)                                                               |
| -1.5                | AF091837                   | 77                            | 328                    | Transcription factor                                 | DNA-binding protein                                                                  |
| 3.7                 | X01365                     | 98                            | 79                     | Unclassified                                         | Chloroplast DNA for 4.5S and 23S ribosomal RNA                                       |
| 2.1                 | Z97336                     | 98                            | 175                    | Unclassified                                         | Hypothetical protein (Arabidopsis)                                                   |
| 1.7                 | AL035656                   | 98                            | 156                    | Unclassified                                         | Putative protein (Arabidopsis)                                                       |
| 1.6                 | AC004218                   | 98                            | 197                    | Unclassified                                         | Medicago nodulin N21-like protein (Arabidopsis)                                      |
| 1.5                 | BE638609                   | 100                           | 349                    | Unclassified                                         | PRT1 protein (tobacco [ <i>Nicotiana tabacum</i> ])                                  |
| -1.6                | A1622713                   | 100                           | 94                     | Unclassified                                         | Leaf primordia cDNA library                                                          |
| -1.5                | BAB08430                   | 81                            | 336                    | Unclassified                                         | GAMM1 protein-like                                                                   |
| -1.7                | D48425                     | 84                            | 292                    | Unclassified                                         | Similar to rice ( <i>Oryza sativa</i> ) RICS14613A rice green shoot <i>O. sativa</i> |

<sup>a</sup> The values, positive and negative, represent fold changes of mRNA abundance in high versus low reciprocal F<sub>1</sub> hybrids for their cold germination phenotype. <sup>b</sup> Accession number of the gene or EST in GenBank, SwissProt/TrEMBL, or PIR databases. <sup>c</sup> Percent identity between the query sequence of the cDNA fragment and the sequence found in the databases. <sup>d</sup> Length (no. of nucleotides) of the cDNA fragment. <sup>e</sup> Functional category based on published literature or Kyoto Encyclopedia of Genes and Genomes database. <sup>f</sup> Description of gene or the source tissue of cDNA library for the EST.

**Table II.** Differentially expressed genes for the DT trait revealed by mRNA profiling

The expression levels of mRNA extracted from R5 stage embryos at 40% kernel moisture content were compared between the F<sub>1</sub> hybrids that were desiccation tolerant (M0021-syn4 × M0337-syn4) and desiccation sensitive (M0337-syn4 × M0021-syn4). The gene/maize EST identities of the cDNA fragments were obtained by BLAST search of the GenBank and SwisProt/TrEMBL databases with probability value of  $\leq 1.0 \times 10^{-7}$ .

| Change <sup>a</sup> | Accession No. <sup>b</sup> | Percent Identity <sup>c</sup> | cDNA Size <sup>d</sup> | Function <sup>e</sup>                               | Gene Description or Source of EST <sup>f</sup>                                                         |
|---------------------|----------------------------|-------------------------------|------------------------|-----------------------------------------------------|--------------------------------------------------------------------------------------------------------|
| <i>-fold</i>        |                            |                               | <i>nt</i>              |                                                     |                                                                                                        |
| -1.7                | P23901;<br>AW231664        | 89; 96                        | 357                    | Carbohydrate and glycerolipid metabolism            | Aldose reductase (EC 1.1.1.21); early embryo cDNA library                                              |
| 1.9                 | U39958                     | 99                            | 322                    | Carbohydrate metabolism                             | NADP-malic enzyme root isoform                                                                         |
| 1.7                 | M58656;<br>AW225169        | 92; 100                       | 84                     | Carbohydrate metabolism                             | Pyruvate orthophosphate dikinase; early embryo cDNA library                                            |
| 1.7                 | AAF86353                   | 97                            | 295                    | Cell growth and signaling                           | SerThr protein phosphatase                                                                             |
| 1.9                 | P23903                     | 100                           | 293                    | Cell wall/defense related                           | $\beta$ -1,3-glucanase A1 precursor                                                                    |
| 1.7                 | AL033545                   | 93                            | 155                    | Cell wall metabolism                                | Extensin-like protein                                                                                  |
| -1.8                | AC007170                   | 78                            | 122                    | Citrate cycle/glyoxylate metabolism                 | Aconitate hydratase (cytoplasmic)                                                                      |
| 1.6                 | AF053468                   | 99                            | 182                    | Cochaperones                                        | DnaJ-related protein                                                                                   |
| 1.6                 | AF085279                   | 100                           | 270                    | Cytoskeletal                                        | Hypothetical ankyrin-like protein                                                                      |
| 2.2                 | L34693                     | 100                           | 105                    | Defense related (PR-5)                              | Thumatin-like protein                                                                                  |
| 2.1                 | X69960                     | 99                            | 114                    | DNA synthesis and replication                       | H2B histone                                                                                            |
| 1.7                 | M36659                     | 97                            | 89                     | DNA synthesis and replication                       | Histone H4 (H4C13) gene                                                                                |
| 1.6                 | X57312                     | 100                           | 239                    | DNA synthesis and replication                       | H2B histone                                                                                            |
| 1.6                 | P80269;<br>AW585278        | 90; 98                        | 260                    | Electron transport and oxidative phosphorylation    | NADH-ubiquinone oxidoreductase (EC 1.6.5.3 and 1.6.99.3); mixed adult tissues cDNA library             |
| 1.6                 | AF004210                   | 99                            | 149                    | Fatty acid/C21 steroid metabolism                   | Cytochrome P-450                                                                                       |
| 1.6                 | Q9XGN7                     | 95                            | 298                    | Glyoxylate and dicarboxylate metabolism             | Citrate synthase (EC 4.1.3.7)                                                                          |
| 1.8                 | Y09506                     | 99                            | 281                    | mRNA processing                                     | Transformer-SR ribonucleoprotein                                                                       |
| 8                   | P81008                     | 100                           | 125                    | Plant defensins (Na <sup>+</sup> 2 channel blocker) | $\gamma$ -ZEATHIONIN 1                                                                                 |
| 1.8                 | AAB31685                   | 98                            | 96                     | Protease inhibitor                                  | Trypsin inhibitor                                                                                      |
| 1.8                 | AF026977                   | 99                            | 194                    | Protect against oxidative damage                    | Microsomal glutathione S-transferase 3                                                                 |
| 1.7                 | AF026977                   | 100                           | 140                    | Protect against oxidative damage                    | Microsomal glutathione S-transferase 3                                                                 |
| 1.5                 | AF107837                   | 94                            | 217                    | Protein degradation                                 | 26S proteasome subunit                                                                                 |
| -1.6                | BAA96834;<br>BE518965      | 88; 98                        | 332                    | Protein degradation                                 | $\beta$ 1-subunit of 20S proteasome; tassel primordium cDNA library                                    |
| -2                  | Q41365                     | 100                           | 43                     | Protein degradation/signaling                       | Protease regulatory subunit                                                                            |
| 6.8                 | M12145                     | 98                            | 136                    | Protein destination and storage                     | Maize 19-kD zein                                                                                       |
| 1.8                 | X56117                     | 100                           | 103                    | Protein destination and storage                     | Maize 27-kD zein locus DNA                                                                             |
| 1.7                 | AF031569                   | 100                           | 327                    | Protein destination and storage                     | 22-kD $\alpha$ -Zein gene cluster                                                                      |
| 1.7                 | P09189                     | 99                            | 301                    | Protein folding and stability                       | Heat shock cognate 70-kD protein                                                                       |
| 1.7                 | Q05045;<br>A1712268        | 71; 99                        | 149                    | Protein folding and stability                       | Heat shock protein 60 kD (CPN60-1, mitochondrial); endosperm                                           |
| -1.5                | BAB09366;<br>AW076363      | 70; 100                       | 101                    | Protein processing and degradation                  | Aspartyl protease; root cDNA library                                                                   |
| -1.5                | U92045                     | 99                            | 159                    | Protein synthesis                                   | Ribosomal protein S6 RPS6-1 (maize)                                                                    |
| -1.7                | AJ237573                   | 98                            | 172                    | Retrotransposon                                     | gag polyprotein precursor                                                                              |
| -1.9                | U70855                     | 93                            | 132                    | RNA/protein synthesis                               | Tyrosyl-tRNA synthetase                                                                                |
| 1.9                 | P25070                     | 100                           | 58                     | Signaling                                           | Calmodulin-related protein (touch induced)                                                             |
| -1.5                | P52409;<br>BE056116        | 81; 100                       | 362                    | Starch and Suc metabolism                           | Glucan endo-1,3- $\beta$ -glucosidase (endohydrolyase) (EC 3.2.1.39); mixed adult tissues cDNA library |
| 1.7                 | P04713                     | 98                            | 276                    | Starch metabolism                                   | Granule-bound glycogen (starch) synthase precursor (EC 2.4.1.11)                                       |
| 1.6                 | AF079260                   | 100                           | 86                     | Starch metabolism                                   | Granule-bound starch synthase (waxy)                                                                   |
| 2.4                 | AL035356                   | 100                           | 235                    | Sulfur metabolism                                   | Putative alliinase                                                                                     |
| 3.3                 | AC005313                   | 100                           | 145                    | Transcription factor                                | Chloroplast nucleoid DNA-binding protein                                                               |
| 2                   | AF087672                   | 100                           | 92                     | Transcription factor                                | eRFS ( <i>Mus musculus</i> )                                                                           |
| -2                  | AC006533                   | 98                            | 90                     | Transcription factor                                | Putative ARI, RING finger protein                                                                      |
| 1.7                 | CAB90214;<br>AW288485      | 88; 100                       | 295                    | Translation machinery                               | Elongation factor 1- $\beta$ ; fusarium infected silk cDNA library                                     |

(Table continues.)

**Table II.** (Table continued from previous page.)

| Change <sup>a</sup> | Accession No. <sup>b</sup> | Percent Identity <sup>c</sup> | cDNA Size <sup>d</sup> | Function <sup>e</sup> | Gene Description or Source of EST <sup>f</sup>                    |
|---------------------|----------------------------|-------------------------------|------------------------|-----------------------|-------------------------------------------------------------------|
| -fold               |                            |                               | nt                     |                       |                                                                   |
| 3.5                 | AI711766                   | 92                            | 198                    | Unclassified          | Endosperm cDNA library                                            |
| 3                   | AI739952                   | 99                            | 209                    | Unclassified          | Endosperm cDNA library                                            |
| 2.3                 | U84881                     | 99                            | 429                    | Unclassified          | Envelope glycoprotein                                             |
| 2                   | AW927832                   | 100                           | 89                     | Unclassified          | Mixed adult tissues cDNA library                                  |
| 1.9                 | AI619108                   | 100                           | 388                    | Unclassified          | Leaf primordia cDNA library                                       |
| 1.8                 | AI740005                   | 100                           | 310                    | Unclassified          | Endosperm cDNA library                                            |
| 1.8                 | AF081810                   | 97                            | 305                    | Unclassified          | LdOrf-129 peptide ( <i>Lymantria dispar</i> nucleopolyhedrovirus) |
| 1.7                 | D15843;<br>AW225169        | 90; 100                       | 265                    | Unclassified          | Early nodulin; early embryo cDNA library                          |
| 1.7                 | Q9XIR5;<br>AI670584        | 72; 100                       | 133                    | Unclassified          | Translational activator; endosperm cDNA library                   |
| 1.6                 | AW066498                   | 100                           | 170                    | Unclassified          | Mixed stages of another and pollen cDNA library                   |
| 1.6                 | AW202549                   | 99                            | 282                    | Unclassified          | Early embryo cDNA library                                         |
| 1.6                 | AI600894                   | 100                           | 135                    | Unclassified          | Leaf primordia cDNA library                                       |
| 1.5                 | AC005850                   | 100                           | 113                    | Unclassified          | Unknown protein (Arabidopsis)                                     |
| 1.5                 | AI902013                   | 99                            | 353                    | Unclassified          | Inbred Tassel cDNA library                                        |
| 1.5                 | AF049892                   | 99                            | 171                    | Unclassified          | Embryo-specific protein                                           |
| -1.5                | AC004218                   | 100                           | 65                     | Unclassified          | Unknown protein (Arabidopsis)                                     |
| -1.6                | AI920497                   | 99                            | 326                    | Unclassified          | Root cDNA library                                                 |
| -1.6                | AL035356                   | 99                            | 278                    | Unclassified          | Putative protein (Arabidopsis)                                    |
| -1.9                | O22155                     | 83                            | 267                    | Unclassified          | T14P1.23 PROTEIN—Arabidopsis (Mouse-ear cross)                    |

<sup>a</sup> The values, positive and negative, represent fold changes of mRNA abundance in the tolerant versus sensitive reciprocal F<sub>1</sub> hybrids to high temperature desiccation. <sup>b</sup> Accession number of the gene or EST in GenBank, SwissProt/TrEMBL, or PIR databases. <sup>c</sup> Percent identity between the query sequence of the cDNA fragment and the sequence found in the databases. <sup>d</sup> Length (no. of nucleotides) of the cDNA fragment. <sup>e</sup> Functional category based on published literature or Kyoto Encyclopedia of Genes and Genomes database. <sup>f</sup> Description of gene or the source tissue of cDNA library for the EST.

(by GeneCalling) or cloned sequence identification. Confirmation was revealed by the selective disappearance of the corresponding peak in the electrophoretic scans (Fig. 5).

### Protein Expression Profiles

The average protein yields were 14% and 19.5% (dry weight basis) for embryos at 40% moisture content and 11-d-old germinating embryo axes, respectively, suggesting that most of the proteins were extracted from the tissue. The principle steps involved in the protein expression profiling are illustrated in Figure 6.

A total of 7,419 and 6,585 unique features (proteins with different pI/M<sub>r</sub> combinations) were detected across samples within the CG and DT traits, respectively. Of these, 2,641 and 1,876 features were consistently detected above the background threshold level for CG and DT experiments, respectively. The F-test identified 117 features in CG and 205 features in DT samples that were significantly differentially expressed ( $P < 0.1$ ) with  $\geq 1.5$ -fold change between the reciprocal F<sub>1</sub>s. A subset of these features was further analyzed to obtain the protein identification.

The selected protein features were excised from

the gels and subjected to in-gel trypsin digestion. The database search using tryptic-oligopeptide mass and tandem mass spectral (MS/MS) information with SEQUEST program (Fennigan Corp.) resulted in the identification (annotation) of many proteins. The representative PEMs with the annotated proteins that are differentially expressed between the reciprocal F<sub>1</sub> hybrids are shown in Figure 7. The reason why some of the protein features are difficult to see on the gels is that they are expressed at low levels and can only be detectable by the highly sensitive scanners.

Protein identifications obtained for 56 features in the CG experiment (Fig. 7A) and 54 features in the DT experiment (Fig. 7B) are listed in Tables III and IV, respectively. Identification of the remaining features in each trait could not be obtained because of the database limitations. The oligopeptide masses and MS/MS spectral data of some of the features matched more than one gene. For example, globulin-2 precursor and nucleoside diphosphate kinase I with pI 6.5 and M<sub>r</sub> 12,010 (protein feature no. 4,413; Table III) or globulin 1L and superoxide dismutase with pI 4.9 and M<sub>r</sub> 13,670 (protein feature no. 3,544; Table IV) had either the same or different oligopeptide sequence matches. On the other hand,

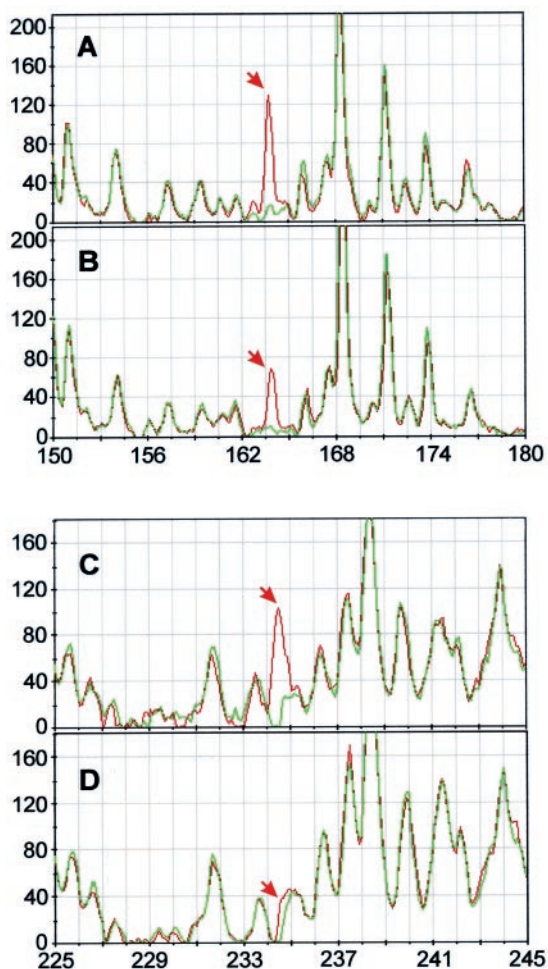

**Figure 5.** Competitive PCR confirmation of the differentially expressed mRNA between the reciprocal  $F_1$  hybrids. The traces in red are controls and those in green are of competitive PCR using gene specific primers (see “Materials and Methods” for details). A and B show traces of cDNA fragments of the reciprocal  $F_1$  hybrids that were high (M0081-syn0  $\times$  M0023-syn0) and low (M0023-syn0  $\times$  M0081-syn0), respectively, for the CG phenotype. Competitive PCR with specific primers to abscisic acid- and stress-inducible protein (AF09573; see Table I) caused the red (control) peak (shown by the red arrow) to disappear, confirming the gene identity. Similarly, C and D show the traces of the desiccation tolerant (M0021-syn4  $\times$  M0337-syn4) and sensitive (M0337-syn4  $\times$  M0021-syn4) reciprocal  $F_1$  hybrids, respectively, showing the competitive PCR confirmation with alliinase (AL035356; see Table II) specific primers. The red traces in each of the panels represent an average of six electrophoretic traces of the digests from replicate samples. The differential expression (i.e. fold change) of the cDNA fragments can be gauged by comparing the peak heights of the red traces between A and B and also between C and D. The length of the cDNA fragment is shown along the x axis as number of nucleotides, and the height of the peaks (y axis) represent the abundance in arbitrary fluorescence units.

two or more protein features had the same annotation. For example, several protein features in both CG (Table III) and DT (Table IV) were annotated to be globulin-2 precursor proteins.

## DISCUSSION

### Screening and Phenotypic Analysis

Significant variation observed for CG and DT in this population of RILs enabled us to select the most

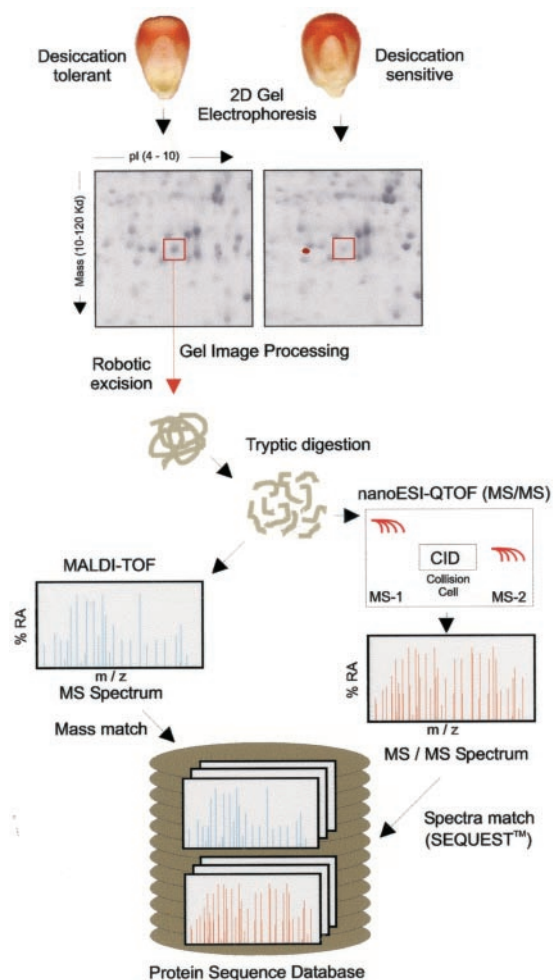

**Figure 6.** Schematic representation of the protein profiling process. Protein extracts from the samples were resolved on two-dimensional gels, first by their pI followed by their relative molecular mass. The gels were stained with a highly sensitive fluorescent dye and were scanned for image data processing. Each protein feature on the gel was cataloged by its position (pI and  $M_r$ ) and density (volume) in the gel, referred to as PEM. The PEMs of replicate samples of each  $F_1$  hybrid were compiled and the differentially expressed protein features between the reciprocal  $F_1$  hybrids were identified. These protein features were then robotically excised and subjected to trypsin digestion (site-specific cleavage at the C-terminal of Lys or Arg residue), and masses of the resulting oligopeptides were measured using matrix-assisted laser-desorption/ionization time of flight mass spectrometer (MS). A portion of the digest was also subjected to MS/MS analysis using nano-electrospray ionization source (Z-spray) on a quadrupole time of flight MS. The uninterpreted fragmentation spectra in combination with the masses of the tryptic fragments were used to query the databases (GenPept, SwissProt, and Pioneer/DuPont and Oxford GlycoSciences’ proprietary) using a computer program (SEQUEST program, Fennigan Corp., San Jose, CA) to obtain the protein identification (for details, see “Materials and Methods”).

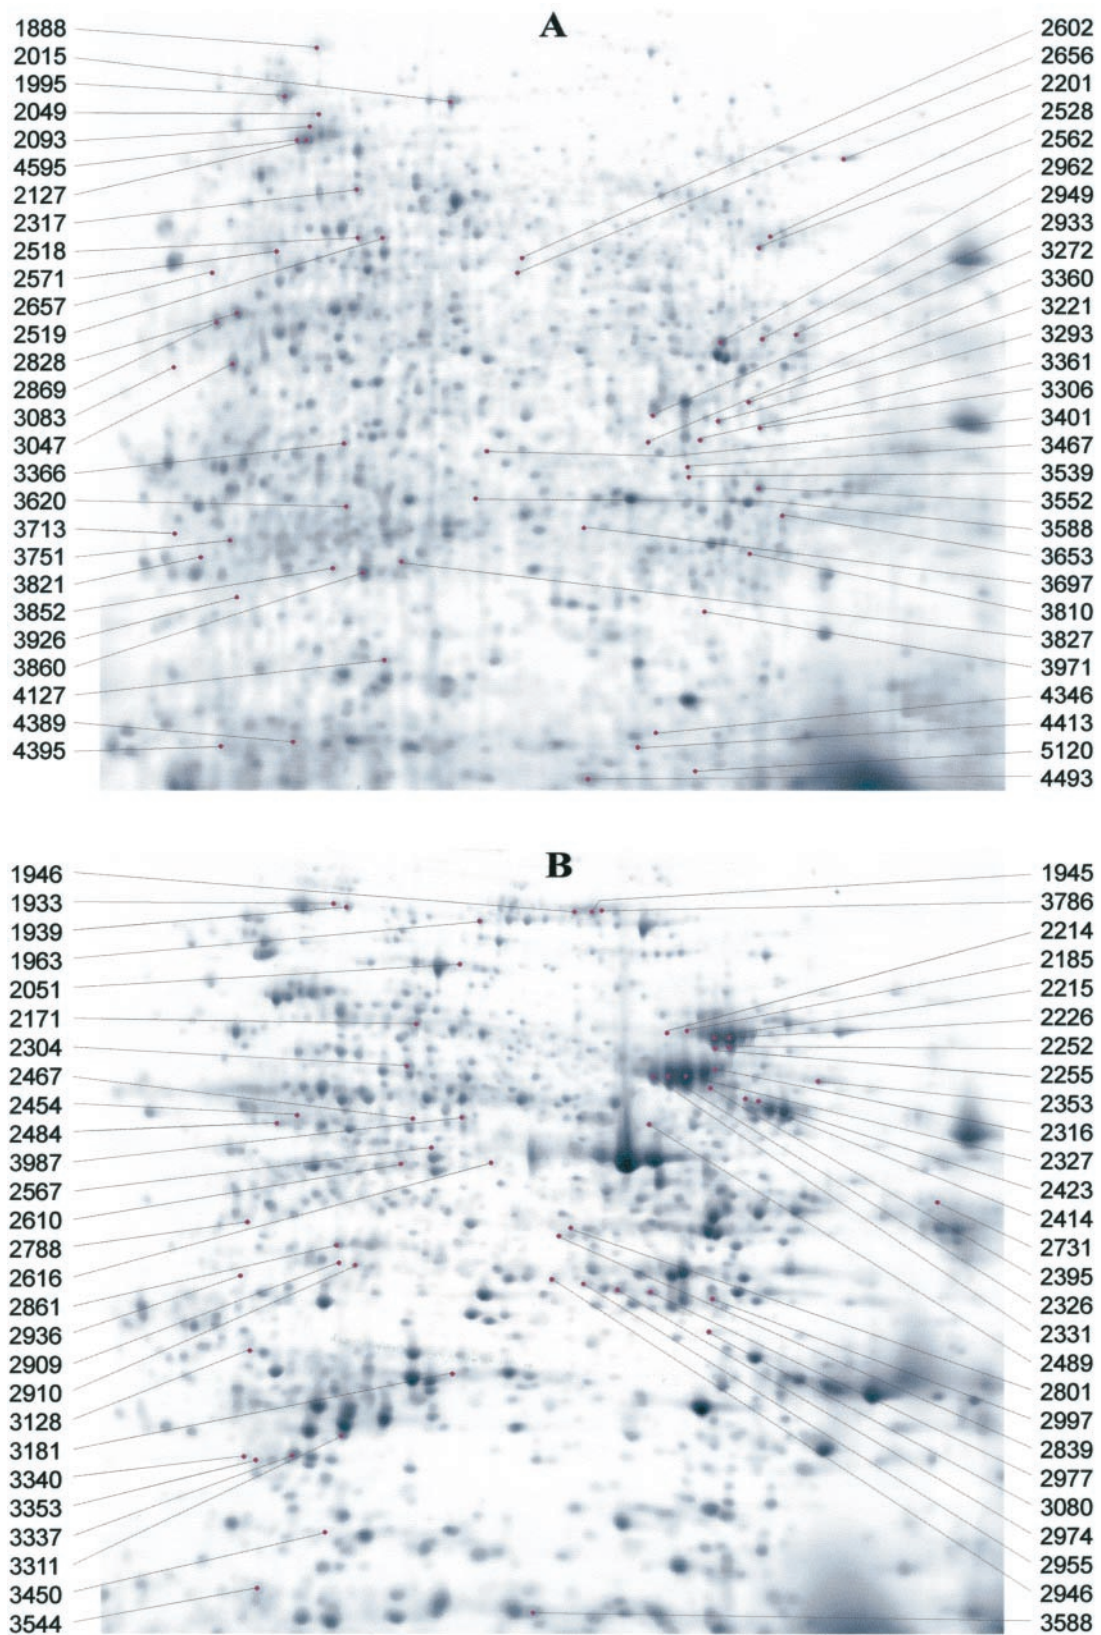

**Figure 7.** PEMs of representative samples for the CG (A) and DT (B) experiments with annotations. The protein features indicated by red spots were differentially expressed between the reciprocal  $F_1$  hybrids. The identification of each of the proteins and their descriptions are provided in Tables III and IV for A and B, respectively.



**Table III.** Differentially expressed genes for the CG trait revealed by protein expression profiling

The expression levels of proteins extracted from embryo axes tissue of seeds germinated for 11 d at 12.5°C in the dark were compared between the reciprocal F<sub>1</sub> hybrids that were high (M0081-syn0 × M0023-syn0) and low (M0023-syn0 × M0081-syn0) for CG phenotype. The gene identities of the proteins were obtained by matching the mass sizes of the trypsin-derived oligopeptides as well as the uninterpreted tandem mass spectra to those generated by a computer algorithm (SEQUEST, Fennigan Corp) from the GenPept, SwisProt, or proprietary databases.

| Protein Feature No. <sup>a</sup> | Change <sup>b</sup> | Function <sup>c</sup>                                                        | Protein Name                                                                          | Accession No. <sup>d</sup> | pI <sup>e</sup> | Mass <sup>f</sup> | Sequence Match <sup>g</sup>                                         | Mass Matches <sup>h</sup> |
|----------------------------------|---------------------|------------------------------------------------------------------------------|---------------------------------------------------------------------------------------|----------------------------|-----------------|-------------------|---------------------------------------------------------------------|---------------------------|
|                                  | <i>-fold</i>        |                                                                              |                                                                                       |                            |                 |                   |                                                                     | <i>n</i>                  |
| 5120                             | 2.92                | Ropane alkaloid biosynthesis                                                 | Putative tropinone reductase                                                          | Q9ZW03                     | 6.8             | 9383              | GIGQAVVEELAR                                                        | 1                         |
| 4395                             | 1.88                | Glycolysis/gluconeogenesis                                                   | Triosephosphate isomerase 1 (maize; EC 5.3.1.1)                                       | L00371                     | 4.7             | 10220             | TNASPEVAESTR                                                        | 3                         |
| 4493                             | -4.84               | Cold/stress responsive with unknown function                                 | LEA protein (EMB564)                                                                  | P46517                     | 6.2             | 10610             | SVEAQEHLAEGR                                                        | 6                         |
| 4413                             | -2.08               | Phosphorylation of nucleoside diphosphates and proteins                      | Nucleoside diphosphate kinase 1                                                       | Q02254                     | 6.5             | 12010             | IIGATNPLASEPGTIR                                                    | 3                         |
| 4413                             | -2.08               | Seed storage protein                                                         | Globulin-2 precursor                                                                  | S15675                     | 6.5             | 12010             | LLAFGADEEQVDR                                                       | 7                         |
| 4389                             | 1.58                | Translational regulation                                                     | Elongation factor 2                                                                   | P13060                     | 5.0             | 12310             | SQILSQEFGWDK;<br>DSVVAGFQWASK                                       | 7                         |
| 4346                             | 1.66                | Ubiquitin-mediated protein degradation                                       | Ubiquitin-conjugating enzyme E2 (Catharanthus roseus)                                 | AF091621                   | 6.6             | 12700             | LELFLPEEYPMMAAPK                                                    | 3                         |
| 4127                             | 2.19                | Unknown                                                                      | Gly-rich protein                                                                      | P27484                     | 5.4             | 16180             | SLNDGDAVEYTVGSGNDGR                                                 | 5                         |
| 3971                             | 2.15                | Ca(2+) and phospholipid-binding proteins with unknown function               | Annexin p33                                                                           | CAA66900                   | 6.9             | 19660             | SITDEISGDFER                                                        | 5                         |
| 3926                             | 2.55                | Methionine metabolism                                                        | 5-Methyltetrahydropteroyl-triglutamate-homocysteine S-methyltransferase (EC 2.1.1.14) | Q9LM03                     | 4.7             | 20680             | IPSAEELADR                                                          | 3                         |
| 3860                             | -1.83               | Seed storage protein                                                         | Globulin-2 precursor                                                                  | S15675                     | 5.3             | 21650             | EGEGVIVLLR;<br>FTHELLEDAVGNRY;<br>GEITASEEQIR;<br>AFLQPSHYDADEVMFVK | 7                         |
| 3827                             | -2.62               | Seed storage protein                                                         | Globulin-2 precursor                                                                  | S15675                     | 5.5             | 22000             | VAELEAAPR;<br>GEITASEEQIR;<br>EGEGVIVLLR;<br>FTHELLEDAVGNRY         | 6                         |
| 3852                             | -1.87               | Seed storage protein                                                         | Globulin-2 precursor                                                                  | S15675                     | 5.1             | 22040             | GEITASEEQIR                                                         | 7                         |
| 3810                             | -1.69               | Signaling (unknown in plants)                                                | Cytokeratin type II                                                                   | NP_004684                  | 7.4             | 22060             | AEAESWYQTK                                                          | 1                         |
| 3821                             | 1.62                | Fru metabolism                                                               | Fructokinase                                                                          | AAA80675                   | 4.6             | 23480             | APGGAPANVAIVSR;<br>TQILSIWDQADIVK                                   | 7                         |
| 3751                             | 1.55                | Microtubule-associated protein                                               | β-3 and -6 tubulin (maize)                                                            | L10633                     | 4.7             | 24340             | YTGNSDLQLER;<br>AVLMDLEPGTMDSVR                                     | 4                         |
| 3713                             | 2.13                | Microtubule-associated protein                                               | DYNACTIN, 150-kD isoform                                                              | Q14203                     | 4.5             | 24770             | LHDAADEIESLR;<br>LGDQLQTAYQEK                                       | 6                         |
| 3653                             | -2.55               | Seed storage protein                                                         | Globulin-2 precursor                                                                  | S15675                     | 7.7             | 24900             | LLAFGADEEQVDR                                                       | 8                         |
| 3697                             | 2.49                | Chaparonin                                                                   | Cytosolic chaperonin, δ-subunit                                                       | CAA09989                   | 6.2             | 25610             | GSNQLVIDEAEER                                                       | 4                         |
| 3620                             | 1.87                | Nucleotide sugar and aminosugar metabolism and glycosaminoglycan degradation | β-Glucosidase, root meristem (EC 3.2.1.-) precursor                                   | A48860                     | 5.2             | 26850             | SIVEDYTYFAK                                                         | 6                         |
| 3552                             | -1.55               | Unknown                                                                      | Hypothetical protein                                                                  | BAB21159                   | 7.4             | 27660             | IFDSLPAEEQR                                                         | 7                         |
| 3588                             | -1.54               | Pyruvate metabolism/cellular detoxification                                  | Glyoxalase II (cytoplasmic isozyme, EC 3.1.2.6)                                       | O24496                     | 5.7             | 28020             | FSVNSPVEAMR;<br>FSVNSPVEAMR;<br>GHISYYVTSK                          | 6                         |

(Table continues.)

**Table III.** (Table continued from previous page.)

| Protein Feature No. <sup>a</sup> | Change <sup>b</sup> | Function <sup>c</sup>                                                                                                          | Protein Name                                                     | Accession No. <sup>d</sup> | pI <sup>e</sup> | Mass <sup>f</sup> | Sequence Match <sup>g</sup>                    | Mass Matches <sup>h</sup> |
|----------------------------------|---------------------|--------------------------------------------------------------------------------------------------------------------------------|------------------------------------------------------------------|----------------------------|-----------------|-------------------|------------------------------------------------|---------------------------|
|                                  | <i>-fold</i>        |                                                                                                                                |                                                                  |                            |                 |                   |                                                | <i>n</i>                  |
| 3539                             | 2.06                | Disease response gene act as membrane-bound chaperone to stabilize mitochondrial proteins                                      | Prohibitin (maize)                                               | AF236369                   | 6.8             | 28660             | LISEATAMAGTGLIELR; SPNVAYIPSGENGGK; DLQMVNLTLR | 9                         |
| 3401                             | -4.95               | Pyruvate metabolism/cellular detoxification                                                                                    | Glyoxalase I (EC 4.4.1.5)                                        | AB017042                   | 5.8             | 30870             | VVLVDNTDFLK; YTIAMLGYADEDK                     | 9                         |
| 3467                             | -2.11               | Disease response gene act as membrane-bound chaperone to stabilize mitochondrial proteins                                      | Prohibitin (maize)                                               | AF236369                   | 6.8             | 30890             | DLQMVNLTLR; SPNVAYIPSGENGGK; VLPSIGNEVLK       | 10                        |
| 3361                             | -2.21               | Pentose and glucuronate interconversions/pyruvate metabolism                                                                   | Aldose reductase (aldehyde reductase; EC 1.1.1.21)               | P23901                     | 6.9             | 31860             | NLAHDPLVEK                                     | 10                        |
| 3306                             | -1.68               | Ca <sup>2+</sup> and phospholipid-binding proteins with unknown function                                                       | Annexin p33                                                      | CAA66900                   | 7.4             | 32010             | SITDEISGDFER; ADPQDEYLR                        | 14                        |
| 3366                             | -3.02               | Cold/stress responsive with unknown function                                                                                   | LEA protein (LEA D-34)                                           | P09444                     | 5.2             | 32160             | FGDVLVDSGELADQPVAPR; LQAEEQSVLGGTQK            | 7                         |
| 3360                             | -2.68               | Seed storage protein                                                                                                           | Globulin-2 precursor                                             | S15675                     | 6.5             | 32170             | EGEGVIVLLR                                     | 9                         |
| 3293                             | -2.51               | Pentose and glucuronate interconversions/pyruvate metabolism                                                                   | Aldose reductase (aldehyde reductase; EC 1.1.1.21)               | P23901                     | 7.1             | 33210             | NLAHDPLVEK                                     | 12                        |
| 3272                             | 13.91               | Protein processing and degradation                                                                                             | Trypsinogen 7 ( <i>M. musculus</i> )                             | AAB69044                   | 6.5             | 34380             | YVNWIIQQTIAAN                                  | 0                         |
| 3221                             | -1.96               | Cold and ABA responsive with probable adaptive function                                                                        | osr40g2                                                          | T03962                     | 7.4             | 34400             | LNFDFAFHGDK; LNFDFAFHGDK; DEEGYPAFALVNK        | 12                        |
| 3047                             | 1.62                | Chaparonin                                                                                                                     | Heat shock protein 82                                            | P33126                     | 4.7             | 39550             | DDQLEYLEER; SDLVNNLGTIAR                       | 14                        |
| 3083                             | 3.34                | Protein processing and degradation                                                                                             | Cysteine proteinase Mir3 (maize)                                 | AF019147                   | 4.5             | 39820             | AVANQPISVAIEAGGR                               | 1                         |
| 2962                             | -1.94               | Cold/stress responsive with unknown function                                                                                   | LEA protein in group 3                                           | D64140                     | 7.1             | 40220             | LTLGQQGHVDVR                                   | 5                         |
| 2949                             | -2.38               | Glycolysis/gluconeogenesis                                                                                                     | Fru-bisphosphate aldolase, cytoplasmic isozyme (EC 4.1.2.13)     | M16220                     | 7.5             | 40490             | LSSINVENVEENR; GDAAADTESLHVK                   | 14                        |
| 2933                             | -2.67               | Glycolysis/gluconeogenesis                                                                                                     | Aldolase (maize) (EC 4.1.2.13)                                   | M16220                     | 7.9             | 40690             | VTPEVIAEYTVR; LSSINVENVEENR                    | 8                         |
| 2869                             | 1.61                | Chaparon/protein trafficking in ER—stress inducible                                                                            | 78-kD Glc-regulated protein precursor (GRP 78)                   | Q16956                     | 4.6             | 44210             | FEELNMDLFR                                     | 2                         |
| 2869                             | 1.61                | Chaparonin                                                                                                                     | Heat shock cognate 70-kD protein                                 | P09189                     | 4.6             | 44210             | FEELNMDLFR                                     | 6                         |
| 2828                             | 1.54                | Chaparonin                                                                                                                     | Heat shock protein 70                                            | P11143                     | 4.7             | 45410             | FEELNMDLFR; SSVHDVVLVGGSTR                     | 8                         |
| 2656                             | 1.82                | Starch and Suc metabolism and flavonoids, stilbene and lignin biosynthesis                                                     | $\beta$ -Glucosidase, chloroplast precursor (maize; EC 3.2.1.21) | U33816                     | 5.9             | 47390             | IGLAFDVMGR; SIVEDYTYFAK                        | 12                        |
| 2657                             | 1.60                | Nucleotide-excision repair protein that inhibits multi-ubiquitin chain formation and the degradation of proteolytic substrates | RAD23 protein                                                    | Q9STA6                     | 4.6             | 47580             | LIQENQAEFLR; IIETTQGGQSTYR; GTNFEIASPASVADVK   | 7                         |
| 2602                             | -1.54               | Retroelement                                                                                                                   | Putative retroelement pol polyprotein (Arabidopsis)              | AAD23707                   | 5.9             | 48790             | WVEAIASPTNDAK                                  | 3                         |

(Table continues.)

**Table III.** (Table continued from previous page.)

| Protein Feature No. <sup>a</sup> | Change <sup>b</sup> | Function <sup>c</sup>                                                    | Protein Name                                                                         | Accession No. <sup>d</sup> | pI <sup>e</sup> | Mass <sup>f</sup> | Sequence Match <sup>g</sup>                                                                                               | Mass Matches <sup>h</sup> |
|----------------------------------|---------------------|--------------------------------------------------------------------------|--------------------------------------------------------------------------------------|----------------------------|-----------------|-------------------|---------------------------------------------------------------------------------------------------------------------------|---------------------------|
|                                  | <i>-fold</i>        |                                                                          |                                                                                      |                            |                 |                   |                                                                                                                           | <i>n</i>                  |
| 2562                             | -1.66               | Gly, Ser and Thr metabolism                                              | Hydroxymethyltransferase (BC 2.1.2.1)                                                | O23254                     | 7.5             | 49710             | YSEGMPGAR                                                                                                                 | 10                        |
| 2571                             | -3.12               | Microtubule-associated protein                                           | Tubulin $\beta$ -1 and -5 chain                                                      | P18025/<br>Q43697          | 4.9             | 50630             | FPGQLNSDLR;<br>VSEQFTAMFR;<br>AVLMDLEPGTMDSVR;<br>AVLMDLEPGTMDSVR;<br>YGGDSDLQLER;<br>NSSYFVEWIPNNVK;<br>ALTVPELTQQMWDAK  | 7                         |
| 2528                             | -2.61               | Seed storage protein                                                     | Globulin precursor (maize)                                                           | M24845                     | 7.6             | 51060             | VFLAGADNVLQK                                                                                                              | 15                        |
| 2518                             | -1.98               | Glycolysis/gluconeogenesis Phe, Tyr, and Trp biosynthesis                | Enolase 1 (EC 4.2.1.11)                                                              | P26301                     | 5.3             | 51430             | VNQIGSVTESIEAVR;<br>VQIVGDDLLVTNPTR;<br>GNPTVEVDVGLSDGSYAR                                                                | 18                        |
| 2519                             | -1.58               | Glycolysis/gluconeogenesis Phe, Tyr and Trp biosynthesis                 | Enolase 1 (EC 4.2.1.11)                                                              | P26301                     | 5.4             | 52110             | VNQIGSVTESIEAVR;<br>VQIVGDDLLVTNPTR                                                                                       | 9                         |
| 2317                             | -1.82               | Chaparonin                                                               | Chaperonin 60 (maize)                                                                | L21007                     | 5.3             | 57220             | NVVIEQSFQAPK;<br>LLEQENTDLGYDAK                                                                                           | 5                         |
| 2201                             | -2.84               | Unknown                                                                  | Putative protein                                                                     | AL080282                   | 8.5             | 63670             | GIVAGEEELVPVGGEK                                                                                                          | 3                         |
| 2127                             | -1.81               | Chaparonin                                                               | Heat shock protein 70                                                                | P11143                     | 5.0             | 67510             | NAVVTVPAYFNDSQR;<br>TTPSYVAFTDSEK;<br>ATAGDTHLGGEDFDNR;<br>MVNHVFVQEFK;<br>EIAEAYLGSTIK;<br>VEIANDQGNR;<br>SSVHDVVLVGGSTR | 9                         |
| 4595                             | -1.51               | Chaparonin                                                               | Heat shock 70-kD protein                                                             | P11143                     | 5.0             | 67590             | EIAEAYLGSTIK;<br>NAVVTVPAYFNDSQR;<br>FEELNMDLFR                                                                           | 10                        |
| 2093                             | 2.85                | Chaparonin                                                               | Heat shock protein 70                                                                | P26413                     | 5.0             | 71950             | NAVVTVPAYFNDSQR;<br>DAGVIAGLNVLR;<br>EIAEAYLGSTIK                                                                         | 9                         |
| 2049                             | -2.19               | Chaparon/protein trafficking in ER                                       | Lumenal binding protein cBiPe2 (maize)                                               | U58208                     | 5.1             | 77220             | FEELNNDLFR;<br>INDAVVTVPAYFNDAQR                                                                                          | 14                        |
| 2015                             | -1.63               | Methionine metabolism                                                    | 5-Methyltetrahydropteroyltriglutamate-homocysteine S-methyltransferase (EC 2.1.1.14) | Q9LM03                     | 5.7             | 77660             | YGAGIGPGVYDIHSPR;<br>YLFAGVVVDRG;<br>IPSAEEIADR;<br>GTQTLGLVTSAGFPAGK;<br>ISEEEYVTAIK;<br>FALESFWDGK                      | 16                        |
| 1995                             | -2.07               | Chaparonin                                                               | Heat shock protein 82                                                                | P33126                     | 5.0             | 81110             | GIVDSEDLPLNISR                                                                                                            | 25                        |
| 1888                             | -4.37               | Cell division                                                            | Cell division cycle protein 48 homolog                                               | Q96372                     | 5.1             | 103100            | TALGTSNPSALR;<br>LDEVGYDDVGGVR                                                                                            | 17                        |
| 1888                             | -4.37               | Chaparon targeting ubiquitinated proteins to proteosomes for degradation | Valosin-containing protein (soybean [Glycine max])                                   | U20213                     | 5.1             | 103100            | KGDLFLVR;<br>LDEVGYDDVGGVR                                                                                                | 17                        |

<sup>a</sup> Unique identification number assigned to a protein spot based on its isoelectric point and molecular mass across all the gels in an experiment. <sup>b</sup> The values, positive and negative, represent fold changes of protein abundance in high vs. low reciprocal F<sub>1</sub> hybrids for their CG phenotype. <sup>c</sup> Functional category based on published literature or Kyoto Encyclopedia of Genes and Genomes database. <sup>d</sup> Accession number of the gene in GenBank, SwissProt/TrEMBL, or PIR databases. <sup>e</sup> pI of the protein. <sup>f</sup> Relative molecular mass (daltons) of the protein. <sup>g</sup> Sequences of the oligopeptides derived from complete peptide (gene) sequence in the databases whose ionization mass spectra were consistent with the  $\gamma$ -type fragmentation spectra observed in the sample. <sup>h</sup> Number of trypsin-derived oligopeptide masses that matched the gene sequence.

**Table IV.** Differentially expressed genes for the DT trait revealed by protein expression profiling

The expression levels of proteins extracted from R5 stage embryos at 40% kernel moisture content were compared between the F<sub>1</sub> hybrids that were desiccation tolerant (M0021-syn4 × M0337-syn4) and desiccation sensitive (M0337-syn4 × M0021-syn4). The gene identities of the proteins were obtained by matching the mass sizes of the trypsin-derived oligopeptides as well as the uninterpreted tandem mass spectra to those generated by a computer algorithm (SEQUEST, Fennigan Corp.) from the GenPept, SwissProt, or proprietary databases.

| Protein Feature No. <sup>a</sup> | Change <sup>b</sup> | Function <sup>c</sup>                                 | Protein Name                                                                          | Accession No. <sup>d</sup> | pI <sup>e</sup> | Mass <sup>f</sup> | Sequence Match <sup>g</sup>                        | Mass Matches <sup>h</sup> |
|----------------------------------|---------------------|-------------------------------------------------------|---------------------------------------------------------------------------------------|----------------------------|-----------------|-------------------|----------------------------------------------------|---------------------------|
|                                  | <i>-fold</i>        |                                                       |                                                                                       |                            |                 |                   |                                                    | <i>n</i>                  |
| 3544                             | 2.40                | Antioxidant                                           | Superoxide dismutase, chloroplast [Cu-Zn] precursor                                   | P93407                     | 4.9             | 13670             | GGHELSTLSTGNAGGR                                   | 3                         |
| 2454                             | -3.89               | Chaparonin                                            | HSP-associated protein-like                                                           | O49648                     | 5.1             | 49890             | IPAAAPSFESPK                                       | 7                         |
| 3786                             | 15.23               | Chaparonin/caseolytic protease B                      | Heat shock protein HSP101 (maize)                                                     | AF133840                   | 6.5             | 105400            | ALAEQLFDDENLLVR;<br>VQLDSQPPEIDNLER                | 14                        |
| 1945                             | 2.78                | Chaparonin/caseolytic protease B                      | Heat shock protein HSP101 (maize)                                                     | AF133840                   | 6.4             | 111500            | VQLDSQPPEIDNLER;<br>WTGIPVTR                       | 37                        |
| 1946                             | -7.02               | Chaparonin/caseolytic protease B                      | Heat shock protein HSP101 (maize)                                                     | AF133840                   | 6.3             | 117000            | VQLDSQPPEIDNLER                                    | 13                        |
| 2801                             | 3.57                | Citrate cycle/Glyoxylate and dicarboxylate metabolism | Malate dehydrogenase (soybean)                                                        | AF180335                   | 6.3             | 39290             | NGVEEVLGLGELNEFEK                                  | 5                         |
| 2788                             | 3.82                | Cold/stress responsive with unknown function          | LEA-like protein                                                                      | O80576                     | 4.9             | 39880             | DFGSVAVWDMIR;<br>IDVDTPFGNMK                       | 7                         |
| 2610                             | 2.73                | DNA methylation                                       | O-Methyltransferase ZRP4 (EC 2.1.1.-)                                                 | P47917                     | 5.5             | 45380             | VIIIDTVLGSR                                        | 4                         |
| 3080                             | 2.80                | Fatty acid biosynthesis                               | 3-Oxoacyl-[acyl-carrier protein] reductase precursor (EC 1.1.1.100)                   | P28643                     | 7.1             | 29890             | LEAPVVVVVTGASR                                     | 3                         |
| 1963                             | 5.32                | Glycolysis                                            | Pyruvate, orthophosphate dikinase (maize; EC 2.7.9.1)                                 | J03901                     | 5.8             | 94460             | FAYDSFR                                            | 7                         |
| 1939                             | 3.79                | Glycolysis                                            | Pyruvate, orthophosphate dikinase (maize)                                             | M58656                     | 5.4             | 104000            | SDFEGIFR;<br>EMQDIEFTVQENR                         | 17                        |
| 1933                             | 2.27                | Glycolysis                                            | Pyruvate, orthophosphate dikinase (maize)                                             | M58656                     | 5.3             | 107200            | FAYDSFR                                            | 22                        |
| 2051                             | 2.41                | Met metabolism                                        | 5-Methyltetrahydropteroyl-triglutamate—homocysteine S-methyltransferase (EC 2.1.1.14) | Q9LM03                     | 5.8             | 74300             | YLFAGVVDGR;<br>IPSAEEIADR;<br>FALESFWDGK           | 11                        |
| 2484                             | -40.08              | Microtubule-associated protein                        | Tubulin α-1                                                                           | P14640                     | 5.0             | 49280             | AVFVDLEPTVIDEVR;<br>TIGGGDDAFNTFFSET-<br>GAGK      | 9                         |
| 2997                             | 7.34                | Pentose and glucuronate interconversions              | Aldose reductase (EC 1.1.1.21)                                                        | P23901                     | 7.1             | 33240             | NLAHIDLVEK;<br>SGHTIPAVGLGTWR                      | 12                        |
| 3181                             | 2.09                | Protein degradation                                   | Multicatalytic endopeptidase                                                          | CAA73624                   | 5.7             | 25020             | TTIFSEGR                                           | 3                         |
| 3588                             | 2.15                | Seed storage protein                                  | Globulin-2 precursor                                                                  | S15675                     | 6.1             | 12050             | LLAFGADEEQQVDR                                     | 2                         |
| 3544                             | 2.40                | Seed storage protein                                  | Vicilin-like storage protein Glb1-L, embryo                                           | B53234                     | 4.9             | 13670             | VFLAGADNVLQK                                       | 6                         |
| 3353                             | -2.03               | Seed storage protein                                  | Vicilin-like storage protein Glb1-L, embryo                                           | B53234                     | 4.9             | 19840             | VFLAGADNVLQK                                       | 5                         |
| 3340                             | -9.32               | Seed storage protein                                  | Vicilin-like storage protein Glb1-L, embryo                                           | B53234                     | 4.9             | 20150             | VFLAGADNVLQK                                       | 5                         |
| 3337                             | -2.94               | Seed storage protein                                  | Vicilin-like storage protein Glb1-L, embryo                                           | B53234                     | 5.1             | 20260             | VFLAGADNVLQK                                       | 5                         |
| 3311                             | 3.11                | Seed storage protein                                  | Globulin-2 precursor                                                                  | S15675                     | 5.4             | 21090             | FTHELLEDVGNRYR;<br>GEITTASEEQIR;<br>VVMLLSPVVSTSGR | 7                         |
| 2977                             | 4.64                | Seed storage protein                                  | Globulin-2 precursor                                                                  | S15675                     | 6.7             | 32910             | VVMLLSPVVSTSGR;<br>GEITTASEEQIR                    | 8                         |

(Table continues.)

**Table IV.** (Table continued from previous page.)

| Protein Feature No. <sup>a</sup> | Change <sup>b</sup> | Function <sup>c</sup>             | Protein Name                                                     | Accession No. <sup>d</sup> | pI <sup>e</sup> | Mass <sup>f</sup> | Sequence Match <sup>g</sup>                       | Mass Matches <sup>h</sup> |
|----------------------------------|---------------------|-----------------------------------|------------------------------------------------------------------|----------------------------|-----------------|-------------------|---------------------------------------------------|---------------------------|
|                                  | <i>-fold</i>        |                                   |                                                                  |                            |                 |                   |                                                   | <i>n</i>                  |
| 2974                             | 3.31                | Seed storage protein              | Globulin-2 precursor                                             | S15675                     | 6.5             | 32960             | GEITTASEEQIR;<br>LLDMDVGLANIAR                    | 11                        |
| 2955                             | 3.09                | Seed storage protein              | Globulin-2 precursor                                             | S15675                     | 6.4             | 33500             | FTHELLEDAVGNYR;<br>GEITTASEEQIR;<br>LLDMDVGLANIAR | 8                         |
| 2946                             | 2.34                | Seed storage protein              | Globulin-2 precursor                                             | S15675                     | 6.2             | 33570             | GEITTASEEQIR;<br>LLDMDVGLANIAR                    | 8                         |
| 2910                             | -2.59               | Seed storage protein              | Globulin-1S, GLB1S                                               | A53234                     | 5.4             | 35200             | VFLAGADNVLQK;<br>IAYVPGNK                         | 8                         |
| 2909                             | -2.21               | Seed storage protein              | Globulin-2 precursor                                             | S15675                     | 5.3             | 36060             | GEITTASEEQIR                                      | 6                         |
| 2731                             | -2.31               | Seed storage protein              | Globulin-2 precursor                                             | S15675                     | 9.9             | 42390             | LLAFGADEEQVDR                                     | 11                        |
| 2567                             | 2.01                | Seed storage protein              | Vicilin-like storage protein Glb1-L, embryo                      | B53234                     | 5.6             | 46700             | VAVLEANPR; VLRPFDEVSR                             | 7                         |
| 2489                             | 2.07                | Seed storage protein              | 12s Globulin                                                     | P14812                     | 6.7             | 49730             | LDQADVSPGAGR;<br>VVVDAMGLLLPR                     | 8                         |
| 2414                             | 3.12                | Seed storage protein              | Vicilin-like storage protein Glb1-L, embryo                      | B53234                     | 7.3             | 51910             | VAVLEANPR                                         | 9                         |
| 2423                             | 3.88                | Seed storage protein              | Vicilin-like storage protein Glb1-L, embryo                      | B53234                     | 7.4             | 52140             | VFLAGADNVLQK                                      | 12                        |
| 2395                             | -3.52               | Seed storage protein              | Globulin-1S, GLB1S                                               | A53234                     | 7.1             | 54060             | RPYVFDR; VFLAGADNVLQK;<br>VAVLEANPR               | 12                        |
| 2327                             | -2.16               | Seed storage protein              | Globulin-1S, GLB1S                                               | A53234                     | 7.0             | 55070             | RPYVFDR; VAVLEANPR;<br>NPESFLSSFSK                | 13                        |
| 2353                             | -3.27               | Seed storage protein              | Globulin-1S, GLB1S                                               | A53234                     | 8.2             | 55320             | VAVLEANPR;<br>VFLAGADNVLQK                        | 12                        |
| 2331                             | -3.00               | Seed storage protein              | Vicilin-like storage protein Glb1-L, embryo                      | B53234                     | 6.7             | 55450             | VLRPFDEVSR; VAVLEANPR                             | 10                        |
| 2326                             | -3.78               | Seed storage protein              | Globulin-1S, GLB1S                                               | A53234                     | 6.9             | 56070             | VLRPFDEVSR; VAVLEANPR                             | 17                        |
| 2316                             | -3.12               | Seed storage protein              | Globulin-1S, GLB1S                                               | A53234                     | 7.1             | 56290             | VAVLEANPR;<br>VFLAGADNVLQK                        | 16                        |
| 2255                             | -4.07               | Seed storage protein              | Vicilin-like storage protein Glb1-L, embryo                      | B53234                     | 7.2             | 57650             | VAVLEANPR                                         | 21                        |
| 2252                             | -4.52               | Seed storage protein              | Globulin-1S, GLB1S                                               | A53234                     | 7.3             | 58310             | RPYVFDR; VAVLEANPR                                | 18                        |
| 2226                             | -3.10               | Seed storage protein              | Globulin-1S, GLB1S                                               | A53234                     | 7.2             | 59830             | RPYVFDR; VAVLEANPR                                | 18                        |
| 2215                             | -4.52               | Seed storage protein              | Vicilin-like storage protein Glb1-L, embryo                      | B53234                     | 7.2             | 60430             | RPYVFDR                                           | 20                        |
| 2185                             | -2.63               | Seed storage protein              | Vicilin-like storage protein Glb1-L, embryo                      | B53234                     | 7.0             | 61790             | VAVLEANPR;<br>VFLAGADNVLQK                        | 18                        |
| 2171                             | -36.20              | Seed storage protein              | Globulin-1S, GLB1S                                               | A53234                     | 5.6             | 62040             | RPYVFDR; VAVLEANPR;<br>VFLAGADNVLQK               | 15                        |
| 2214                             | -8.67               | Seed storage protein              | Globulin-1S, GLB1S                                               | A53234                     | 6.8             | 62320             | VAVLEANPR                                         | 13                        |
| 2304                             | 2.34                | Starch biosynthesis               | Amyloplast-specific transit protein (maize)                      | M24258                     | 5.6             | 55630             | FAFSDYPELNLPER                                    | 13                        |
| 2304                             | 2.34                | Starch biosynthesis               | Granule-bound glycogen (starch) synthase precursor (EC 2.4.1.11) | P04713                     | 5.6             | 55630             | FAFSDYPELNLPER;<br>YGPDAGTDYR                     | 6                         |
| 2861                             | -4.76               | Translational machinery           | 60S acidic ribosomal protein P0                                  | AF227622                   | 5.4             | 37080             | GTVEITPVVELIK;<br>VLIALADNVGSK                    | 4                         |
| 3450                             | 22.81               | Translational machinery/signaling | Translation initiation factor 5A (maize)                         | AAB88614                   | 5.2             | 16090             | LPTDETLVAQIK                                      | 2                         |
| 2467                             | 2.68                | Translational terminator          | Eukaryotic release factor 1 homolog                              | Q39097                     | 5.6             | 49530             | QSVLAAITSAQQR                                     | 5                         |
| 3128                             | 2.12                | Unknown                           | Unknown protein (Arabidopsis)                                    | AC006283                   | 4.9             | 27870             | TINEEGSPIDQLFFR                                   | 2                         |

(Table continues.)

**Table IV.** (Table continued from previous page.)

| Protein Feature No. <sup>a</sup> | Change <sup>b</sup> | Function <sup>c</sup> | Protein Name                                                      | Accession No. <sup>d</sup> | pI <sup>e</sup> | Mass <sup>f</sup> | Sequence Match <sup>g</sup>    | Mass Matches <sup>h</sup> |
|----------------------------------|---------------------|-----------------------|-------------------------------------------------------------------|----------------------------|-----------------|-------------------|--------------------------------|---------------------------|
| 2936                             | -fold<br>3.40       | Unknown               | CG4527 gene product (fruitfly [ <i>Drosophila melanogaster</i> ]) | AE003464                   | 4.9             | 34470             | KEEDMVK                        | <i>n</i><br>7             |
| 2839                             | 2.10                | Unknown               | Unknown protein (Arabidopsis)                                     | AC007171                   | 6.2             | 38490             | IEGGSFLVPR                     | 5                         |
| 2616                             | 2.57                | Unknown               | Unknown protein                                                   | AC005824                   | 5.9             | 45420             | MDFIPGVDGPSEGVP                | 4                         |
| 3987                             | 2.89                | Unknown               | Unknown protein (Arabidopsis)                                     | AC007017                   | 5.8             | 50170             | FDLWESEGDVR;<br>LFITQTGSDSWVGR | 4                         |

<sup>a</sup> Unique identification number assigned to a protein spot based on its pI and molecular mass across all the gels in an experiment. <sup>b</sup> The values, positive and negative, represent fold changes of protein abundance in the tolerant versus sensitive reciprocal F<sub>1</sub> hybrids to high temperature desiccation. <sup>c</sup> Functional category based on published literature or Kyoto Encyclopedia of Genes and Genomes database. <sup>d</sup> Accession number of the gene in GenBank, SwissProt/TrEMBL, or PIR databases. <sup>e</sup> pI of the protein. <sup>f</sup> Relative molecular mass (daltons) of the protein. <sup>g</sup> Sequences of the oligopeptides derived from complete peptide (gene) sequence in the databases whose ionization mass spectra were consistent with the  $\gamma$ -type fragmentation spectra observed in the sample. <sup>h</sup> Number of trypsin-derived oligopeptide masses that matched the gene sequence.

divergent inbreds for evaluation of parent-of-origin effect in reciprocal F<sub>1</sub> hybrids. Because the RIL population was derived from a single cross (B73 × M017), only two possible alleles can occur for any gene at a given locus. Furthermore, each RIL was self-pollinated for at least 11 generations, creating a population of inbreds each of which is homogeneous (one haplotype) and homozygous at most of the loci (Burr and Burr, 1991). Therefore, this RIL population was ideal for studying the genetics of many traits, especially complex ones such as CG and DT included in this study. Comparison of reciprocal F<sub>1</sub> hybrids produced by crossing divergent RILs provided an ideal system (such as comparison of isogenic lines) to identify genes that influence the phenotypes considered.

Of the 25 RIL combinations (five high × five low) in each trait, the majority did not show significant differences between their reciprocal F<sub>1</sub> hybrids (data not shown). However, reciprocal F<sub>1</sub> hybrids between specific divergent RILs showed significant phenotypic differences, suggesting that parent-of-origin effects were influencing these traits in a genotype-specific manner. Differential phenotypic expression between reciprocal F<sub>1</sub> hybrids, as was shown in other studies, is considered primary evidence of the imprinting phenomenon in plants (Kermicle, 1970; Lin, 1982; Ohad et al., 1996; Chadhury et al., 1997; Grossniklaus et al., 1998). Pinnell (1949) and Bdllya and Burris (1988) reported phenotypic differences between the reciprocal F<sub>1</sub> hybrids of selected maize genotypes for CG and DT traits, respectively, but the underlying molecular bases were not explored.

#### Cytoplasmic and Dosage Effects

It is not uncommon to see phenotypic differences between reciprocal F<sub>1</sub> hybrids for many morphological and agronomic traits in maize, especially those caused by cytoplasmic factors (mitochondrial and

chloroplast genomes, commonly referred to as the maternal effect). To discern whether such factors were involved, reciprocal F<sub>1</sub> hybrids were self-pollinated, and phenotypes of the resulting progeny were evaluated. Phenotypic differences between the self-pollinated progeny of the reciprocal F<sub>1</sub> hybrids were significantly reduced compared with the reciprocal F<sub>1</sub> hybrids themselves for both traits. This suggested that there was only a negligible effect of cytoplasmic factors on the phenotypes observed (Fig. 4). Unlike endosperm tissue, the tissues used in this study (embryos at R5 stage and germinating embryo axes) were diploid, and, therefore, dosage of any given gene should be equal from both female and male parent. The genotype of the endosperm can have a significant effect on early embryo development (Chang and Neuffer, 1994), but, to our knowledge, it has not been shown to have an effect on embryos at later stages of development.

#### Imprinting Effect

We hypothesize that the phenotypic differences between the reciprocal F<sub>1</sub> hybrids observed in this study were most likely due to the imprinting phenomenon, and the differentially expressed genes identified were either directly or indirectly associated with such phenomenon. Imprinting was extensively studied in plants involving endosperm genes in maize (Kermicle and Alleman, 1990) and Arabidopsis (Luo et al., 2000; Russinova and de Vries, 2000). One of the best characterized imprinted loci of plants is the *R* locus that controls the anthocyanin pigmentation in maize aleurone. Using maize *B-A* translocation stocks with segmental duplications and deletions of chromosome 10L, Kermicle (1970, 1978) demonstrated that some of the *R* alleles condition mottled pigmentation in the aleurone after paternal transmission. Similarly, Lin (1982), also using maize *B-A* translocations, provided evidence for the im-

printing effect of endosperm factors (*Ef* genes) in normal endosperm growth. The *Ef* genes, some of which are also located on chromosome 10L, were shown to support normal growth of endosperm only when inherited from the male parent.

In this study, we observed various  $\alpha$ -tubulin genes to be differentially expressed in embryo and germinating-embryo axis tissues between the reciprocal crosses in both CG (Table I) and DT (Table IV) traits. Lund et al. (1995b) reported differential demethylation of  $\alpha$ -tubulin genes between embryo and endosperm tissues in maize where DNA demethylation correlated with the increased accumulation of *tub $\alpha$ 2* and *tub $\alpha$ 4* RNA. Furthermore, they also reported that the differential demethylation occurred in the endosperm tissue between reciprocal crosses of maize inbred lines (W64A and A69Y) and that the demethylation state of *tub $\alpha$ 3* and *tub $\alpha$ 4* was maternally transmitted.

The fertilization independent seed (*FIS*) genes (*MEA* or *FIS1*, *FIS2*, and *FIE* or *FIS3*) that repress Arabidopsis endosperm development in the absence of pollination are perhaps the most studied imprinted genes in plants at the molecular level (Grossniklaus et al., 1998; Luo et al., 2000). Earlier observations of imprinting (parent-specific transmission) of these genes have come from studying the reciprocal  $F_1$  hybrids involving wild-type and mutant alleles of *FIS* genes (Ohad et al., 1996). Vielle-Calzada et al. (2000) recently reported that only maternal alleles were expressed during early embryogenesis (up to 64-cell stage embryo) and endosperm development in Arabidopsis. However, the authors also reported that the paternal alleles were expressed 3 to 4 d after fertilization. In this study, we demonstrate that embryos derived from seed of reciprocally cross-pollinated inbreds can display divergent phenotypes and differential patterns of gene expression, despite the fact that they are genetically identical.

### mRNA Profiling

We used GeneCalling technology of CuraGen Corporation (New Haven, CT) to profile differences of mRNA expression between the reciprocal  $F_1$  hybrids that displayed significant phenotypic divergence in their ability to tolerate high-temperature desiccation or germinate under cold conditions. Shimkets et al. (1999) showed that the GeneCalling profiling procedure could yield at least one detectable cDNA fragment from more than 90% of expressed genes with an average of 2.3 fragments per gene when 72 restriction enzyme pairs were used. In our study, we used 89 and 88 enzyme pairs for CG and DT traits, respectively, yielding >32,000 cDNA fragments in each case. Only a subset (< 2%) of these showed  $\geq 1.5$ -fold change in their expression between the reciprocal  $F_1$  hybrids. Comparison of reciprocal  $F_1$ s, which are

genetically identical (also, we sampled diploid tissue), helped eliminate the effect of DNA polymorphism that can significantly increase false positives (the number of cDNA fragments not relevant in influencing the trait) in the GeneCalling process.

A subset of the differentially expressed cDNA fragments was selected for further analyses via competitive PCR or cloning and sequencing. Twenty-four genes were positively confirmed from a total of 336 cDNA fragments that were differentially expressed ( $\geq 1.5$ -fold change) between the high- and low-reciprocal  $F_1$ s for CG (Table I). Similarly, the identification of 64 genes was positively confirmed out of 656 differentially expressed cDNA fragments between desiccation-tolerant and -sensitive reciprocal  $F_1$  hybrids (Table II). The maximum expression fold change observed for the CG trait was 14.8 (Table I) and that in DT was 8.0 (Table II). BLAST analyses revealed that all the genes were in public databases, either in GenBank composite/expressed sequence tag (EST) or in SwissProt/TrEMBL, and belong to wide functional categories (Tables I and II).

### Protein Profiling

Systematic survey of subcellular or whole-cell proteins by either N-terminal Edman sequencing or tandem mass spectrometry of individual spots resolved on a two-dimensional gel followed by database searching is fast becoming a common method of choice in developing maps of proteomes in various organisms, including plants (Peltier et al., 2000). To our knowledge, a survey of differentially expressed proteins that are attributable to a specific trait (phenotype) has never been reported in plants. In this study, we compared protein profiles of reciprocal  $F_1$  hybrids that showed differential phenotypes for CG and DT traits.

Protein expression map (PEM) analysis with Oxford GlycoSciences' (Oxfordshire, UK) technology involved high-resolution quantitative detection (femtomol levels) of polypeptides followed by identification of proteins by database query using MS/MS spectral data (Page et al., 1999). In addition, PEM analysis can also provide insight into posttranslational modifications, proteolytic derivation, or isoforms of the same protein. For example, enolase 1 was annotated for two different protein features, numbers 2,518 and 2,519 (Table III; Fig. 7A), with a mass difference of 680 d and a pI difference of 0.1. These values suggest that the former protein is a proteolytic derivative of the latter or that they are isoforms of same enzyme, perhaps localized in different subcellular compartments. In maize, enolase 1 (*eno1*) is induced under anaerobic stress but *eno2* is constitutive. Lal et al. (1998) speculated that the regulation of these genes involves post-translational modification. MS/MS of a few of the protein features in this study were matched to two different proteins

each. Such annotations include protein feature numbers 4,413, 2,869, and 1,888 in Table III and 3,544 and 2,304 in Table IV. Some of these have common sequence motifs suggesting that they have functional similarity or that they belong to the same regulatory pathway.

### Differentially Expressed Genes

The differentially expressed genes revealed by mRNA profiling and by protein profiling were different in both CG and DT traits. Nonetheless, several genes with similar functions and biochemical pathways were represented in both types of expression profiling. Examples include glycolytic/gluconeogenic pathway enzymes, members of cell wall and polyamine metabolism, ABA/stress-induced proteins, components of the cytoskeleton, chaperonins, etc. (Tables I–IV). Although we cannot know with certainty, perhaps the same genes were not observed by both profiling methods within each trait because only a subset of the total population of differentially expressed cDNA fragments and proteins were identified. A more comprehensive analysis of expressed proteins would require cellular fractionation and enrichment methods to identify low-abundance proteins.

Some of the genes observed in this study were previously shown to be associated with biotic and abiotic stress response in maize during seed development and germination. These include ABA/stress-inducible proteins, heat shock proteins, late embryogenesis abundant (LEA) proteins, and proteases (Yacoub and Filion, 1986; Prasad, 1996; Nieto-Sotelo et al., 1999; White et al., 2000). Upon comparing the accession numbers of drought and cold-induced genes in *Arabidopsis* reported by Seki et al. (2001) with the differentially expressed genes in this study (Tables I–IV), we found none of the genes to be in common. A closer examination by the gene description revealed that the expression of several genes, including LEA proteins, enolase, Cys protease, glyoxalase I, nodulin, heat shock protein dnaJ, and  $\beta$ -glucosidase were changed in both studies. Expression of these genes was modulated in the same direction in both the studies, except one of the LEA proteins, enolase, and glyoxalase I (Seki et al., 2001; Tables I–IV). This could be explained by differential embryo morphology, temporal and developmental differences, mono- and dicotyledonous nature, differences in experimental conditions, and differential responses of various isoforms of these genes to stress.

Protein profiling of reciprocal  $F_1$ s for the CG trait showed modulation in expression of genes involved in protein degradation such as proteases and proteins associated with trafficking of ubiquitinated proteins to proteosomes (Fu et al., 1999; Tables I and III). These proteins may play a role in mobilization of proteins from the scutellum to the growing meris-

tems of the primary root and shoot during germination. Proteosome (26S and 20S) component proteins and proteases were also differentially expressed for the DT trait (Table II) and, in an analogous way, may be important in preconditioning the embryo so as to render it more tolerant of high-temperature stress during the final phase of maturation.

Protein expression profiling of reciprocal  $F_1$  hybrids divergent for DT showed 30 different globulin polypeptides. That is more than double the number of previously reported globulin fractions (Cross and Adams, 1983a, 1983b). Globulins are encoded by *Glb1* and *Glb2* genes, which are present in only one or two copies each in the maize genome (Belanger and Kriz, 1991; Wallace and Kriz, 1991). However, the details of post-translational processing and assembly of such a large number of polypeptides into protein bodies remain unclear. It was interesting to note that the majority of globulin 1 fractions were down-regulated, whereas globulin 2 fractions were up-regulated in the desiccation-tolerant  $F_1$  hybrid. Sequence alignment of *Glb1* and *Glb2* revealed no significant similarity. Further examination is required to understand the effect of globulins on DT in maize.

Some of the differentially expressed genes observed in this study were implicated in more than one function, including structural, enzymatic, and regulatory with various subcellular localizations. True functions of many of the genes are currently being studied. It is important to understand that both of these traits are complex in that the allelic condition of many genes at different loci, rather than a single or a few genes, may determine the phenotype. It is not surprising that these traits were associated with a large number of genes encompassing a broad range of biochemical pathways. This is, in fact, borne out by the mere number of genes we measured as differentially expressed in this tightly controlled comparison. It is reasonable to assume that pleiotropic effects of a subset of the differentially expressed genes caused altered expression of some of the other genes identified in this study. It is expected that among the genes identified as “differential” there lie those that are intimately involved in controlling cellular processes that lead to the manifestation of differences in CG and DT phenotypes.

## MATERIALS AND METHODS

### Germplasm Screening and Reciprocal $F_1$ Hybrid Production

Recombinant inbred populations were generated from a cross between B73 and MO17. The inbred lines were derived by self-pollinating the original  $F_1$  plants (syn0) or sib-mating the original  $F_1$  plants for two (syn2) or four (syn4) cycles, followed by self-pollinating each line of the  $F_2$  progeny for at least 11 generations. These lines were screened for their ability to tolerate high desiccation temperature when harvested at high seed-moisture content (for DT) and to germinate under cold conditions (for CG and DT). The lab-based CG test was performed according to Byrum and Copeland (1995) with minor modifications. Seeds were germinated in rolls of wet



germination paper and incubated at 10°C for 7 d followed by 3 d at 27°C in the dark. Seedlings that had  $\geq 2.5$  cm shoot and  $\geq 2.5$  cm primary root lengths were considered germinated. In some cases, the primary root and shoot lengths were also recorded as a measure of seedling vigor (data not shown).

For the DT trait, 100 RILs that showed high germination under cold test conditions when harvested at low seed moisture (approximately 25%, R6 stage or physiological maturity) and dried at low (35°C/normal) temperature were screened. The screening was done by harvesting self-pollinated ears at low ( $\leq 25\%$ ) or high ( $\geq 40\%$ , R5, or dent stage) seed-moisture content and drying at low (35°C, relative humidity [RH] 51%) or high (43°C, RH 28%) temperatures followed by performing the CG test. For the CG trait, self-pollinated ears harvested after physiological maturity from 780 RILs were screened using the CG test. Five contrasting RILs for each trait, DT (tolerant: M0002-syn0, M0021-syn4, M0212-syn4, M0241-syn0, M0363-syn4; and sensitive: M0079-syn0, M0213-syn0, M0247-syn4, M0337-syn4, M0367-syn2) and CG (high: M0029-syn2, M0062-syn0, M0081-syn0, M00324-syn0, M00367-syn2; and low: M0023-syn0, M0028-syn0, M00106-syn4, M0113-syn2, M0342-syn0), were selected for crossing. The divergent RILs were self-pollinated and cross-pollinated reciprocally in a diallel experimental design. Seeds from the selected reciprocally crossed ears ( $F_1$ s) were grown and self-pollinated in the following season to test for cytoplasmic inheritance of the traits.

## Phenotypic Analysis and Sample Collection

Self-pollinated and reciprocally cross-pollinated ears for the DT study were harvested at high (R5 stage) and low (R6 stage) seed moisture. After drying treatments at low (35°C, RH 51%) and high (43°C, RH 28%) temperatures, CG was evaluated on three individual ears for each treatment as described earlier. Similarly, five mature individual self- and reciprocally cross-pollinated ears were tested for the CG trait.

Specific combinations of RILs were identified based on the phenotypic analyses where the reciprocal  $F_1$  hybrids displayed significant differences. In case of the DT trait, a few rows of kernels were removed from each ear before drying treatment to estimate moisture content and to dissect embryos (only from seeds harvested at 40% moisture content) for RNA and protein extraction. In case of the CG trait, embryo axes tissue of seed germinated for 11 d at 12.5°C in the dark were used to extract RNA and protein.

## GeneCalling Analysis of mRNA from Reciprocal $F_1$ Hybrids

The GeneCalling procedure involves a comprehensive quantitative analysis of differentially expressed transcripts. Isolated mRNA is converted to double-stranded cDNA, which in turn is subjected to digestion with specific pairs of restriction enzymes (restriction fragments). Gene identification is accomplished by matching fragment size(s) using a computer algorithm to query against virtual digests of genes in a database (see Rothberg et al., 1999; Bruce et al., 2000). In brief, total RNA was isolated from 1 to 2 g of ground tissue using the PUREscript kit (Gentra Systems, Inc., Minneapolis). Isolation of poly(A<sup>+</sup>) RNA, cDNA preparations, restriction digestion, adapter ligation and PCR amplification, restriction fragment separation, comparison and identification of differentially expressed fragments, and gene identification and confirmation were performed according to Shimkets et al. (1999). The cDNA preparations of CG and DT samples were digested with 89 and 88 restriction enzyme pairs, respectively. Fragments from each digest were ligated to and PCR amplified with restriction enzyme-specific oligonucleotide adaptor/primer pairs. One of the primers was labeled with fluorescamine and the other with biotin. Labeled fragments were purified using streptavidin beads and were resolved by high-resolution capillary gel electrophoresis to generate traces showing peaks whose position and height represented  $M_r$  and abundance of cDNA fragment(s), respectively. Trace data were used for qualitative ( $M_r$ ) and quantitative (abundance) comparisons between the samples from reciprocal  $F_1$  hybrids.

The cDNA fragments that showed  $\geq 1.5$ -fold change between the reciprocal  $F_1$  hybrids were identified from the trace database and were queried against publicly available maize (*Zea mays*) sequences and ESTs from the proprietary Pioneer/DuPont database for gene identification. The cDNA fragments that did not match any genes in the database were cloned from the original PCR reaction and sequenced using standard protocols. Genes

identified through the GeneCalling process or via cloning of fragments were confirmed by a competitive PCR method in which the original PCR reaction was re-amplified in the presence or absence of an excess quantity of unlabeled gene/sequence-specific primers (a few additional bases into the template). Gene identification was positively confirmed if competitive PCR caused the chromatographic peak of the particular cDNA species to completely disappear. On occasion, in cases where there was more than one cDNA species at a single point of the chromatogram (i.e. different cDNA fragments with the same  $M_r$ ), then a partial reduction of peak height would occur, also confirming the gene identification.

All the cloned and sequenced cDNA fragments were subjected to BLASTX and BLASTN analyses by querying against public and proprietary databases (Altschul et al., 1990). Initial searches were performed against GenBank and SwissProt/TrEMBL, and genes with  $\geq 93\%$  identity of the entire query fragment were recorded. Remaining sequences were searched in the EST databases, and the accession numbers were recorded.

## Protein Expression Profiling

Proteomic analysis involved high-resolution separation on two-dimensional gels, gel image analysis, robotic excision, MS/MS analysis, and protein identification by querying virtual spectra of database proteins (Fig. 6). Page et al. (1999) described in detail various steps involved in this procedure. The same processes were followed in this experiment with minor modifications as described below.

Proteins from frozen ground tissue were extracted in a buffer containing 8 M urea, 2 M thiourea, 65 mM dithiothreitol, and 4% (w/v) CHAPS. After 4 h of extraction on a shaker at 4°C, the supernatants were subjected to two-dimensional gel electrophoresis consisting of isoelectric focusing in the first dimension followed by SDS-PAGE in the second dimension. Three gels were run for each sample. The gels were stained with fluorescent dye OGT MP17 that binds non-covalently to the SDS moiety attached to the protein, enabling features at sub-nanogram quantities to be visualized. High-resolution (200  $\mu$ m) scans of the gels were electronically stored in a database for image analyses. Each protein feature found across replicate gels was indexed (with pI and relative  $M_r$ ) along with its average (across replicate gels) intensity, and recorded as percentage of the total feature intensity (percent volume). Such definition of all the features in a given sample across the replicate gels is referred to as PEM. Samples from three replicate ears from each reciprocal  $F_1$  hybrid of a given trait were organized into a table by the protein feature index numbers using Melanie II software (Wilkins et al., 1996).

Differential protein expression between the reciprocal  $F_1$  hybrids was analyzed using statistical methods. The raw percent volume data of each protein feature across replicate gels and samples of each  $F_1$  genotype were subjected to analysis of variance. Features that showed significant percent volume difference ( $P \leq 0.1$ ) between the reciprocal  $F_1$ s and were clearly visible in the gel images of at least one genotype were used to calculate ratios indicating fold expression differences. Fold change in expression was derived by taking the ratio of mean percent volume of a given feature between the reciprocal  $F_1$  samples. Proteins that showed  $\geq 1.5$ -fold change in expression were excised from the gel by a software-driven robotic cutter and delivered in a 96-well plate for proteolysis and MS analyses.

Excised proteins were subjected to trypsin digestion, and the mass of the oligopeptides were estimated by matrix-assisted laser-desorption ionization time of flight mass spectrometer (ELITE, PerSeptive Biosystems, Framingham, MA). For MS/MS analyses, nano-electrospray ionization source (Z-spray) on a quadrupole time of flight instrument (Micromass, Manchester, UK) was used to generate fragmentation spectra. These uninterpreted MS/MS of the peptides were converted to centered spectra and used to query public (GenPept and SwissProt) and proprietary (Pioneer/DuPont and Oxford GlycoSciences) databases using a computer algorithm (SEQUEST program, Fennigan Corp.) based on the approach of Eng et al. (1994). The sequences of the oligopeptides were derived by matching the predicted ion series from a complete peptide sequence in the database consistent with the observed y-type fragmentation of peptide pools in the sample (Biemann, 1990).

## ACKNOWLEDGMENTS

We thank Emily van de Mortel (Pioneer Seed Physiology group) for her extensive technical support in RI population screening, crossing, and phe-

notypic analyses; Dale Wilson (Pioneer Seed Physiology group) for his help with statistical analysis; the Pioneer winter nursery staff in Puerto Vallarta, Mexico, for field support; and Oswald Crasta (CuraGen Corporation) and Jeremy Hayter (Oxford GlycoSciences Plc) for technical support and helpful discussions.

Received November 20, 2001; returned for revision January 21, 2002; accepted March 5, 2002.

## LITERATURE CITED

- Alleman M, Doctor J (2000) Genomic imprinting in plants: observations and evolutionary implications. *Plant Mol Biol* **43**: 147–161
- Altschul SF, Gish W, Miller W, Myers EW, Lipman DJ (1990) Basic local alignment search tool. *J Mol Biol* **215**: 403–410
- Bagnara D, Daynard TB (1983) Reciprocal differences in kernel growth among four maize inbreds. *Maydica XXVII*:357–363
- Bdliya PM, Burris JS (1988) Diallel analysis of tolerance of drying injury in seed corn. *Crop Sci* **28**: 935–938
- Belanger FC, Kriz AL (1991) Molecular basis for allelic polymorphism of the maize *Globulin-1* gene. *Genetics* **129**: 863–872
- Biemann K (1990) Sequencing of peptides by tandem mass spectrometry and high-energy collision-induced dissociation. *Methods Enzymol* **193**: 455–479
- Bochicchio A, Rizzi E, Balconi C, Vernieri P, Vazzana C (1994a) Sucrose and raffinose contents and acquisition of desiccation tolerance in immature maize embryos. *Seed Sci Res* **4**: 123–126
- Bochicchio A, Vernieri P, Puliga S, Balducci F, Vazzana C (1994b) Acquisition of desiccation tolerance by isolated maize embryos exposed to different conditions: the questionable role of endogenous abscisic acid. *Physiol Plant* **91**: 615–622
- Brenac P, Horbowicz M, Downer SM, Dickerman AM, Smith ME, Obendorf RL (1997) Raffinose accumulation related to desiccation tolerance during maize (*Zea mays* L.) seed development and maturation. *J Plant Physiol* **150**: 481–488
- Bruce W, Folkerts O, Garnaat C, Crasta O, Roth B, Bowen B (2000) Expression profiling of the maize flavonoid pathway genes controlled by estradiol-inducible transcription factors CRC and P. *Plant Cell* **12**: 65–79
- Burr B, Burr FA (1991) Recombinant inbreds for molecular mapping in maize: theoretical and practical considerations. *Trends Genet* **7**: 55–60
- Burris JS (2000) Physiology of seed development and deterioration. In SH Moore, JJ Volenec, DM Karl, eds, *Genetic Improvement of Seed Quality*. Crop Science Society of America, Inc., Madison, WI, pp 1–9
- Byrum JR, Copeland LO (1995) Variability in vigour testing of maize (*Zea mays* L.) seed. *Seed Sci Technol* **23**: 543–549
- Chang MT, Neuffer MG (1994) Endosperm-embryo interaction in maize. *Maydica* **39**: 9–18
- Chaudhuri S, Messing J (1994) Allele-specific parental imprinting of *dzr1*, a posttranscriptional regulator of zein accumulation. *Proc Natl Acad Sci USA* **91**: 4867–4871
- Chaudhuri AM, Ming L, Miller C, Craig S, Dennis ES, Peacock WJ (1997) Fertilization-independent seed development in *Arabidopsis thaliana*. *Proc Natl Acad Sci USA* **94**: 4223–4228
- Chen Y, Burris JS (1991) Desiccation tolerance in maturing maize seed: membrane phospholipid composition and thermal properties. *Crop Sci* **31**: 766–770
- Cross JW, Adams WR (1983a) Differences in the embryo-specific globulins among maize inbred lines and their hybrids. *Crop Sci* **23**: 1160–1162
- Cross JW, Adams WR (1983b) Embryo-specific globulins from *Zea mays* L. and their subunit composition. *J Agric Food Chem* **31**: 534–538
- Eng JK, McCormack AL, Yates JR III (1994) An approach to correlate tandem mass spectral data of peptides with amino acid sequences in a protein database. *J Am Soc Mass Spectrom* **5**: 976–989
- Feil R, Khosla S (1999) Genomic imprinting in mammals: an interplay between chromatin and DNA methylation? *Trends Genet* **15**: 431–435
- Fu H, Doelling JH, Rubin DM, Vierstra RD (1999) Structural and functional analysis of six regulatory particle triple-A ATPase subunits from the *Arabidopsis*26S proteasome. *Plant J* **18**: 529–539
- Gilmour SJ, Zarka DG, Stockinger EJ, Salazar MP, Houghton JM, Thomashow MF (1998) Low temperature regulation of the *Arabidopsis* CBF family of AP2 transcriptional activators as an early step in cold induced COR gene expression. *Plant J* **16**: 433–442
- Grossniklaus U, Vielle-Calzada J-P, Hoepfner MA, Gagliano WB (1998) Maternal control of embryogenesis by *MEDEA*, a *Polycomb* group gene in *Arabidopsis*. *Science* **280**: 446–450
- Groszmann A, Sprague GF (1948) Comparative growth rates in a reciprocal maize cross: 1. The kernel and its component parts. *J Am Soc Agron* **40**: 88–98
- Hoegemeyer TC, Gutormsen TJ (2000) Identifying maize inbreds with inherently better seed quality. In SH Moore, JJ Volenec, DM Karl, eds, *Genetic Improvement of Seed Quality*. Crop Science Society of America, Inc., Madison, WI, pp 39–46
- Jaglo-Ottosen KR, Gilmour SJ, Zarka DG, Schabenberger O, Thomashow MF (1998) *Arabidopsis* CB<sub>1</sub> overexpression induces COR genes and enhances freezing tolerance. *Science* **280**: 104–106
- Janowiak F, Markowski A (1987) Effect of chilling on germination, growth, survival and membrane permeability in seedlings of different breeding forms of maize (*Zea mays* L.). *Acta Physiol Plant* **9**: 77–87
- Jeddeloh JA, Stokes TL, Richards EJ (1999) Maintenance of genomic methylation requires a SWI2/SNF2-like protein. *Nat Genet* **22**: 94–97
- Kasuga M, Liu Q, Miura S, Yamaguchi-Shinozaki, Shinozaki K (1999) Improving plant drought, salt, and freezing tolerance by gene transfer of a single stress-inducible transcription factor. *Nat Biotechnol* **17**: 287–291
- Kermicle JL (1970) Dependence of the R-mottled aleurone phenotype in maize on mode of sexual transmission. *Genetics* **66**: 69–85
- Kermicle JL (1978) Imprinting of gene action in maize endosperm. In DB Walden, ed, *Maize Breeding and Genetics*. John Wiley & Sons, New York, pp 357–371
- Kermicle JL, Alleman M (1990) Gametic imprinting in maize in relation to the angiosperm life cycle. *Dev Suppl* **9**: 14
- Lal SK, Lee C, Sachs MM (1998) Differential regulation of enolase during anaerobiosis in maize. *Plant Physiol* **118**: 1285–1293
- Leprince O, Atherton NM, Deltour R, Hendry GAF (1994) The involvement of respiration in free radical processes during loss of desiccation tolerance in germinating *Zea mays* L. *Plant Physiol* **104**: 1333–1339
- Leprince O, Colson P, Houssier C, Deltour R (1995) Changes in chromatin structure associated with germination of maize and their relation with desiccation tolerance. *Plant Cell Environ* **18**: 619–629
- Leprince O, Hendry GAF, McKersie BD (1993) The mechanisms of desiccation tolerance in developing seed. *Seed Sci Res* **3**: 231–246
- Lin B-Y (1982) Association of endosperm reduction with parental imprinting in maize. *Genetics* **100**: 475–486
- Liu Q, Kasuga M, Sakuma Y, Abe H, Miura S, Yamaguchi-Shinozaki K, Shinozaki K (1998) Two transcription factors, DREB1 and DREB2, with an EREBP/AP2 DNA binding domain separate two cellular signal transduction pathways in drought- and low-temperature-responsive gene expression, respectively, in *Arabidopsis*. *Plant Cell* **10**: 1391–1406
- Lund G, Ciceri P, Viotti A (1995a) Maternal-specific demethylation and expression of specific alleles of zein genes in the endosperm of *Zea mays* L. *Plant J* **8**: 571–581
- Lund G, Messing J, Viotti A (1995b) Endosperm-specific demethylation and activation of specific alleles of  $\alpha$ -tubulin genes of *Zea mays* L. *Mol Gen Genet* **246**: 716–722
- Luo M, Bilodeau P, Dennis ES, Peacock WJ, Chaudhuri A (2000) Expression and parent-of-origin effects for *FIS2*, *MEA*, and *FIE* in the endosperm and embryo of developing *Arabidopsis* seeds. *Proc Natl Acad Sci USA* **97**: 10637–10642
- Miller PA, Brimhall B (1951) Factors influencing the oil and protein content of corn grain. *Agron J* **43**: 305–311
- Nieto-Sotelo J, Kannan KB, Martinez LM, Segal C (1999) Characterization of a maize heat-shock protein 101 gene, *HSP101*, encoding a ClpB/Hsp100 protein homologue. *Gene* **230**: 187–195
- Obendorf RL (1997) Oligosaccharides and galactosyl cyclitols in seed desiccation tolerance. *Seed Sci Res* **7**: 63–74
- Ohad N, Margossian L, Hsu Y-C, Williams C, Repetti P, Fischer RL (1996) A mutation that allows endosperm development without fertilization. *Proc Natl Acad Sci USA* **93**: 5319–5324
- Oishi MY, Bewley JD (1990) Distinction between the responses of developing maize kernels to fluridone and desiccation in relation to germinability,  $\alpha$ -amylase activity, and abscisic acid content. *Plant Physiol* **94**: 592–598
- Page MJ, Amess B, Townsend RR, Parekh R, Herath A, Brusten L, Avelil MJ, Stein RC, Waterfield MD, Davies SC et al. (1999) Proteomic definition of normal human luminal and myoepithelial breast cells puri-

- fied from reduction mammoplasties. *Proc Natl Acad Sci USA* **96**: 12589–12594
- Peltier J-B, Friso G, Kalume DE, Roepstorff P, Nilsson F, Adamska I, Van Wijk KJ** (2000) Proteomics of the chloroplast: systematic identification and targeting analysis of lumenal and peripheral thylakoid proteins. *Plant Cell* **12**: 319–341
- Perdomo A, Burris JS** (1998) Histochemical, physiological, and ultrastructural changes in the maize embryo during artificial drying. *Crop Sci* **38**: 1236–1244
- Pinnell EL** (1949) Genetic and environmental factors affecting corn seed germination at low temperatures. *Agron J* **41**: 562–568
- Prasad TK** (1996) Mechanisms of chilling-induced oxidative stress injury and tolerance in developing maize seedlings: changes in antioxidant system, oxidation of proteins and lipids, and protease activities. *Plant J* **10**: 1017–1026
- Prasad TK** (1997) Role of catalase in inducing chilling tolerance in pre-emergent maize seedlings. *Plant Physiol* **114**: 1369–1376
- Reik W, Walter J** (2001) Genomic imprinting: parental influence on the genome. *Nature Rev Genet* **2**: 21–32
- Rothberg JM, Deem MW, Simpson JW, inventors** February 16, 1999. Method and apparatus for identifying, classifying, or quantifying DNA sequences in a sample without sequencing. United States Patent No. 5,871,697
- Russinova E, de Vries S** (2000) Parental contribution to plant embryos. *Plant Cell* **12**: 461–463
- Santis AD, Landi P, Genchi G** (1999) Changes of mitochondrial properties in maize seedlings associated with selection for germination at low temperature: fatty acid composition, cytochrome c oxidase, and adenine nucleotide translocase activities. *Plant Physiol* **119**: 743–754
- Schell LP, Daneshmandi DA, Anderson JR Jr, Patterson RP** (1991) Rapid isolation and measurement of adenosine triphosphate levels in corn embryos germinated at suboptimal temperatures. *Crop Sci* **31**: 425–430
- Seki M, Narusaka M, Abe H, Kasuga M, Yamaguchi-Shinozaki, Carninci P, Hayashizaki Y, Shinozaki K** (2001) Monitoring the expression pattern of 1300 *Arabidopsis* genes under drought and cold stresses by using a full-length cDNA microarray. *Plant Cell* **13**: 61–72
- Shimkets RA, Lowe DG, Tai JT, Sehl P, Jin H, Yang R, Predki PF, Rothberg BE, Murtha MT, Roth ME et al.** (1999) Gene expression analysis by transcript profiling coupled to a gene database query. *Nat Biotechnol* **17**: 798–803
- Shinozaki K, Yamaguchi-Shinozaki K** (2000) Molecular responses to dehydration and low temperature: differences and cross-talk between two stress signaling pathways. *Curr Opin Plant Biol* **3**: 217–223
- Stewart DR, Martin BA, Geding L, Cerwick S** (1990a) Respiration and alternative oxidase in corn seedling tissues during germination at different temperatures. *Plant Physiol* **92**: 755–760
- Stewart DR, Martin BA, Geding L, Cerwick S** (1990b) Seedling growth, mitochondrial characteristics, and alternative respiratory capacity of corn genotypes differing in cold tolerance. *Plant Physiol* **92**: 761–766
- Stockinger EJ, Gilmour SJ, Thomashow MF** (1997) *Arabidopsis thaliana* CH<sub>1</sub> encodes an AP2 domain-containing transcriptional activator that binds to the C-repeat/DRE, a cis-acting DNA regulatory element that stimulates transcription in response to low temperature and water deficit. *Proc Natl Acad Sci USA* **94**: 1035–1040
- Thomashow MF** (1999) Plant cold acclimation: freezing tolerance genes and regulatory mechanisms. *Annu Rev Plant Physiol Plant Mol Biol* **50**: 571–599
- Tilghman SM** (1999) The sins of the fathers and mothers: genomic imprinting in mammalian development. *Cell* **96**: 185–193
- Vielle-Calzada J-P, Bhaskar R, Grossniklaus U** (2000) Delayed activation of the paternal genome during seed development. *Nature* **404**: 91–94
- Vielle-Calzada J-P, Thomas J, Spillane C, Coluccio A, Hoepfner MA, Grossniklaus U** (1999) Maintenance of genomic imprinting at the *Arabidopsis medea* locus requires zygotic *DDM1* activity. *Genes Dev* **13**: 2971–2982
- Wallace NH, Kriz AL** (1991) Nucleotide sequence of a cDNA clone corresponding to the maize *Globulin-2* gene. *Plant Physiol* **95**: 973–975
- White CN, Proebsting WM, Hedden P, Rivin CJ** (2000) Gibberellins and seed development in maize: I. Evidence that gibberellin/abscisic acid balance governs germination versus maturation pathways. *Plant Physiol* **122**: 1081–1088
- Wilkins MR, Hochstrasser DF, Sanchez J-C, Bairoch A, Appel RD** (1996) Integrating two-dimensional gel databases using the Melanie II software. *Trends Biochem Sci* **21**: 496–497
- Wolkers WF, Boicchio A, Selvaggi G, Hoekstra FA** (1998) Fourier transform infrared microspectroscopy detects changes in protein secondary structure associated with desiccation tolerance in developing maize embryos. *Plant Physiol* **116**: 1168–1177
- Yacoob RK, Filion WG** (1986) The effects of cold-temperature stress on gene expression in maize. *Biochem Cell Biol* **65**: 112–119
